1 **Amyloid precursor protein localises to ependymal cilia in**  
2 **vertebrates and is required for ciliogenesis and brain development**  
3 **in zebrafish**

4  
5 Jasmine Chebli<sup>1</sup>, Maryam Rahmati<sup>1</sup>, Tammarn Lashley<sup>2,3</sup>, Birgitta Edeman<sup>4</sup>, Anders Oldfors<sup>4</sup>,  
6 Henrik Zetterberg<sup>1,3,5,6</sup> and Alexandra Abramsson<sup>1</sup>

7  
8 <sup>1</sup>*Institute of Neuroscience and Physiology, Department of Psychiatry and Neurochemistry, The*  
9 *Sahlgrenska Academy, University of Gothenburg, Gothenburg, Sweden.*

10 <sup>2</sup>*Queen Square Brain Bank for Neurological Disorders, Department of Clinical and Movement*  
11 *Neurosciences, Queen Square Institute of Neurology, University College London, London, UK.*

12 <sup>3</sup>*Department of Neurodegenerative Disease, UCL Institute of Neurology, Queen Square, London, United*  
13 *Kingdom.*

14 <sup>4</sup>*Department of Laboratory Medicine, University of Gothenburg, Gothenburg, Sweden.*

15 <sup>5</sup>*Clinical Neurochemistry Laboratory, Sahlgrenska University Hospital, Mölndal, Sweden.*

16 <sup>6</sup>*UK Dementia Research Institute, London, United Kingdom.*

17  
18 *Corresponding author: [alexandra.abramsson@neuro.gu.se](mailto:alexandra.abramsson@neuro.gu.se). Institute of Neuroscience and Physiology,*  
19 *Department of Psychiatry and Neurochemistry, The Sahlgrenska Academy, University of Gothenburg,*  
20 *S-41345 Gothenburg, Sweden.*

21  
22 **Abstract**

23 Amyloid precursor protein (APP) is ubiquitously expressed in human, mice and in zebrafish.  
24 In zebrafish, there are two orthologues, Appa and Appb. Interestingly, some cellular processes  
25 associated with APP overlap with cilia-mediated functions. Whereas the localization of APP to  
26 primary cilia of *in vitro*-cultured cells has been reported, we addressed the presence of APP in  
27 motile and in non-motile sensory cilia and its potential implication for ciliogenesis using  
28 zebrafish, mouse, and human samples. We report that Appa and Appb are expressed by ciliated  
29 cells and become localized at the membrane of cilia in the olfactory epithelium, otic vesicle and

30 in the brain ventricles of zebrafish embryos. App in ependymal cilia persisted in adult zebrafish  
31 and was also detected in mouse and human brain. Finally, we found morphologically abnormal  
32 ependymal cilia and smaller brain ventricles in *appa*<sup>-/-</sup>*appb*<sup>-/-</sup> mutant zebrafish. Our findings  
33 demonstrate an evolutionary conserved localisation of APP to cilia and suggest a role of App  
34 in ciliogenesis and cilia-related functions.

35

## 36 **Introduction**

37 Amyloid precursor protein (APP) is a ubiquitously expressed type-1 transmembrane protein  
38 that, together with the APP-like protein 1 and -2 (APLP1, APLP2), comprises the *APP* gene  
39 family. In addition to their various splice forms, they are all post-translationally modified  
40 through proteolytic processing (1). Although the physiological relevance of the fragments  
41 generated is not fully understood, one of these, the amyloid-beta peptide (A $\beta$ ) originating from  
42 the transmembrane domain of the APP protein, is the main component of brain amyloid plaques  
43 in Alzheimer's disease (AD) (1, 2). Beyond its pathological involvement, studies on APP have  
44 revealed essential physiological functions including neurogenesis (3, 4), neurite outgrowth (5,  
45 6), adhesion properties (6, 7), synapse formation (8), and neuronal migration (6, 9, 10).  
46 Nevertheless, the involvement of each APP family member in these processes remains unclear,  
47 since redundancy makes it difficult to unravel the contribution of a specific protein (11).  
48 Although the molecular mechanisms behind the APP-related processes are yet to be determined,  
49 accumulating evidence support that APP orchestrates cellular processes through receptor-like  
50 interactions with both inter- and intra-cellular signaling molecules (6).

51 The cilium is a highly conserved organelle across species, which contributes to a wide range of  
52 cellular processes (12). Cilia can broadly be categorized into motile and non-motile. Non-motile  
53 cilia include primary cilia, which are ubiquitously expressed on most cells as a single short

54 antenna-like structure, and sensory cilia, that are only expressed by specific cells. Primary cilia  
55 are enriched in receptors and sites for inter-cell signaling transduction and are notably  
56 implicated in cell division, autophagy, midbrain development, memory and learning abilities  
57 (13). As for the sensory cilia, they are notably found in the otic vesicle as stereocilia and  
58 kinocilia. Motile cilia are present on cells involved in fluid movement including the epithelium  
59 of the respiratory tract and the ependymal layer of the brain ventricles. Ependymal cells are  
60 derived from radial glial cells and when fully differentiated are decorated with tufts of motile  
61 cilia anchored with roots at the apical cellular membrane (12, 14). The coordinated periodic  
62 beating of the cilia participate in the generation of cerebrospinal fluid (CSF) flow within  
63 ventricle cavities (15). Circulation of CSF is believed to facilitate transfer of signaling  
64 molecules and removal of metabolic waste products to prevent accumulation of neurotoxic  
65 residues in the brain parenchyma (16-18).

66 There are several findings supporting a connection between APP and cilia. First, part of the  
67 wide range of cilia-mediated functions overlap with processes linked to APP, *e.g.*, cognitive  
68 impairment (19), differentiation of neurons (20), formation of corpus callosum (19, 21),  
69 neuronal migration (22-24) and sensing of guidance molecules (25). Second, overexpression of  
70 APP impairs primary cilia both in a mouse AD model and in individuals with Down syndrome,  
71 harboring three copies of *APP* (26, 27). The latter is also associated with decreased CSF flow  
72 and accumulation of CSF (hydrocephalus), two phenotypes commonly associated with defects  
73 in motile cilia (28). Finally, APP has been shown to localize to primary cilia *in vitro* and A $\beta$   
74 exposure results in reduced cilia length (29). Taken together, these findings warrant further  
75 investigations of the role of APP in both motile and non-motile cilia.

76 In the present study, we address the presence of APP in motile and non-motile (sensory) cilia  
77 and its possible functions using zebrafish, mouse and human samples. We found that the  
78 zebrafish App homologues are expressed by ciliated cells and become localized at the

79 membrane of cilia in the otic vesicle, the nasal epithelium, and the brain ventricles of zebrafish  
80 embryos. The presence of App in ependymal cilia persisted in adult zebrafish and was also  
81 detected in the ependymal cells of mouse and human brains. In addition, we show that zebrafish  
82 embryos with mutations in both *app* paralogues (*appa*<sup>-/-</sup>*appb*<sup>-/-</sup>) have morphologically abnormal  
83 ependymal cilia and smaller brain ventricles compared with wild-type siblings.

84

## 85 **Results**

### 86 *Appa and appb mRNA expression patterns at the brain ventricular limits*

87 The zebrafish *app* genes, *appa* and *appb*, are expressed in the CNS, and have both distinct and  
88 shared expression patterns (7, 30). Due to the lack of specific antibodies, we used fluorescent  
89 whole mount *in situ* hybridization to increase the cellular resolution of *appa* and *appb* mRNA  
90 expression in areas with motile cilia on 30 hpf wild-type larvae zebrafish (**Figure 1**). Consistent  
91 with previous studies, we observed *appa* mRNA expression in the lens, the olfactory bulb and  
92 epithelium, in the trigeminal ganglia and in the otic vesicle. (**Figure 1C**). Similarly, the *appb*  
93 mRNA expression signal corroborated previous data on *appb* mRNA expression (30) in the  
94 olfactory and otic vesicle epithelia (**Figure 1H**).

95 In addition, both *appa* (**Figures 1C-G and high magnification Figures 1N,O**) and *appb*  
96 (**Figures 1H-L, P,Q**) mRNA signals labelled cells lining the diencephalic ventricle both in the  
97 dorsal and ventral areas. Negative controls did not show any specific signal (**Supplementary**  
98 **file 1**). Together, these results show expression of *appa* and *appb* in areas with ciliated cells,  
99 including cells lining brain ventricles, otic vesicle and olfactory organ, thus suggesting a  
100 possible role of App in cilia formation and function.

101

**Figure 1.** Expression of *appa* and *appb* mRNA in zebrafish larvae

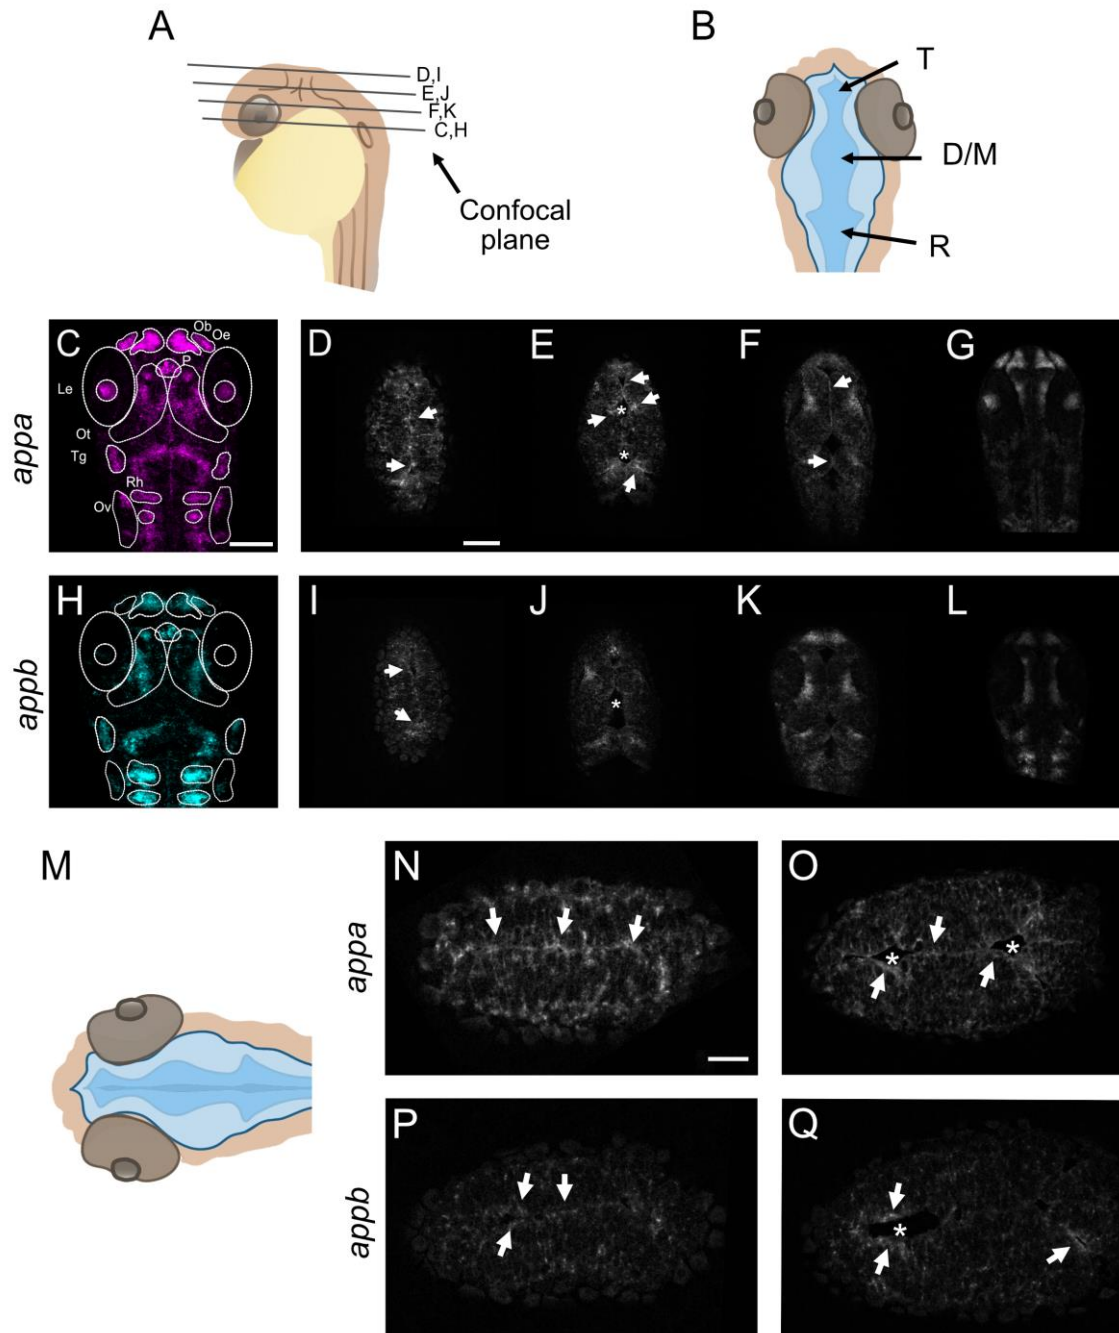

102

103 **Figure 1.** Expression pattern of *appa* and *appb* mRNA. (A,B) Schematic representations of head and  
 104 ventricle morphology of a 30 hpf zebrafish larvae, lateral (A) and dorsal (B) view. (C,H) Whole-mount  
 105 fluorescent *in situ* of *appa* (C) and *appb* (H) in 30 hpf WT zebrafish larvae. Single focal planes, dorsal  
 106 to ventral, of whole-mount larvae of *appa* (D-G) and *appb* (I-L) probe. (M) Schematic view of focal  
 107 plane of the dorsal area of the brain ventricle. (N-Q) Single focal plane at high magnification (40x) of  
 108 *appa* (N,O) and *appb* (P,Q) probes. T= telencephalic ventricle, D/M= diencephalic/mesencephalic  
 109 ventricle, R= rhombencephalic ventricle, Ob= olfactory bulb, Oe= olfactory epithelium, P= pituitary  
 110 gland, Le= lens, Ot= optic tectum, Tg= trigeminal ganglia, Rh= rhombomeres, Ov= otic vesicle.  
 111 Magnification: (C-L)= 20x, (N-Q)= 40x. Scale bar: (C)=100µm, (D)= 50µm, (N)= 25µm. \* indicates  
 112 ventricular space and arrows highlight expression.

113

114 ***App protein is localized to cilia of the olfactory sensory neurons and otic vesicle in zebrafish***  
115 ***larvae***

116 The expression of both *appa* and *appb* in ciliated cells made us ask if the proteins become  
117 distributed out to the cilia. The zebrafish olfactory epithelium and the otic vesicle comprise  
118 ciliated cells and are regions where both *appa* and *appb* mRNAs are expressed. To address if  
119 Appa and Appb become localized to these cilia, we performed immunofluorescent staining on  
120 zebrafish larvae.

121 *Olfactory sensory neuron cilia*

122 We used the Y188 antibody, binding to a conserved epitope in the C-terminal end of human,  
123 mouse, and zebrafish App (**Figure 6C**), in combination with the anti-acetylated tubulin  
124 antibody, labelling microtubule structures of cilia. Immunofluorescent co-labelling detected a  
125 punctate App signal in the heavily ciliated olfactory epithelium area at 30 hpf (**Figure 2A**).  
126 However, while the resolution of the images did not allow distinction between each cilium, App  
127 signal seemed to localize to most of them. In addition to the cilium, App expression was also  
128 found at the base of these motile cilia (**Figure 2A'**).

129 *Otic vesicle cilia*

130 Similar to the olfactory neurons, high accumulation of App was noted at the base of the cilia in  
131 the otic vesicle. In zebrafish, hair cells of the otic vesicle have two types of cilia, a long single  
132 kinocilium and a bundle of shorter stereocilia (31). The immunofluorescent staining revealed  
133 App expression in both types of cilia at early time points in the larvae development (**Figures**  
134 **2B-C**). Staining of 24 hpf larvae with glutamylated tubulin, highlighting the cilia basal body,  
135 clearly showed an App signal within the hair cells and close to the basal body (**Figures 2B,**  
136 **B',B''**). App expression became more distinct at 30 hpf (**Figure 2C**). Plots of the intensity  
137 profile of App (green) and acetylated tubulin (magenta) showed a punctate distribution of App

138 throughout the kinocilium (*Figure 2D*), which supports that App localizes to the cilium  
139 membrane (*Figure 2E*). No signal was detected in the intensity profile in the absence of App  
140 puncta (*Figure 2F*), and the negative control (absence of primary antibody) was negative  
141 (*Supplementary file 2*). Moreover, a 3D-projection of the immunostaining similarly showed  
142 co-localization of App and acetylated tubulin (*Supplementary file 2A*). Together, these data  
143 show expression of App in cilia and ciliated cells of the otic vesicle and olfactory bulb and  
144 indicate that App is located at the cilia membrane.

145



**Figure 2.** App protein is localized to non-primary cilia in zebrafish larvae

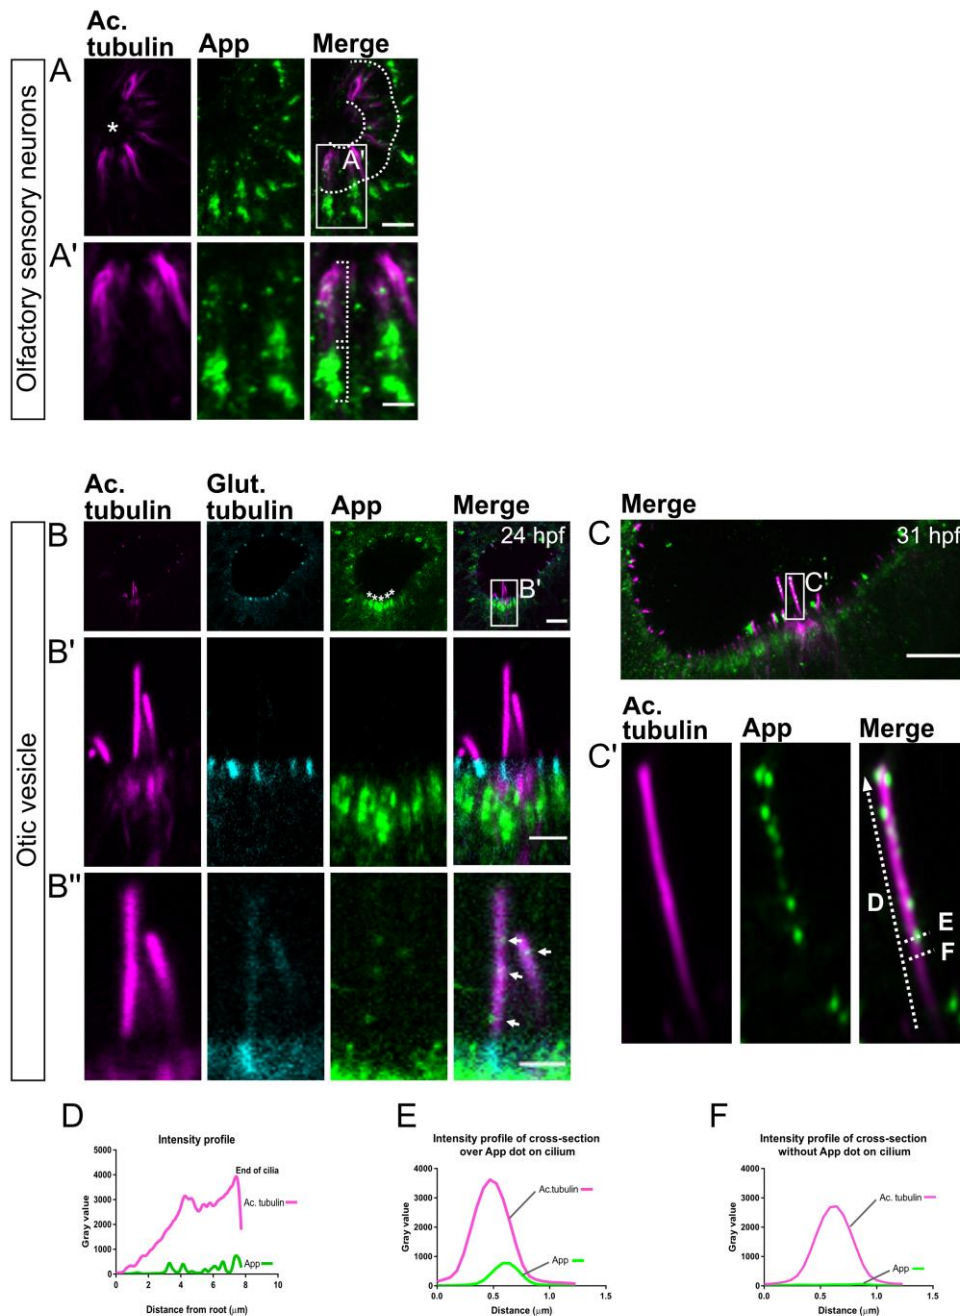

146

147 **Figure 2.** Localization of App protein to cilia of the olfactory sensory neurons and otic vesicle in 31 hpf larvae.  
 148 Cilia as shown by immunostaining for acetylated tubulin (magenta) and App (green) of the olfactory sensory  
 149 neurons in the nose epithelium (**A**) and the otic vesicle (**B-C**). In (**A**), dotted lines demarcate the cilia from the  
 150 nasal cavity (see asterisk). (**A'**) App (green) is found along the cilia and accumulating at their base. Otic vesicle of  
 151 24 hpf (**B**) and 31 hpf larvae (**C**). In (**B**), glutamylated tubulin (cyan) highlights the base of the cilia outlined by  
 152 acetylated tubulin staining (magenta). (**B**) Overview of the kinocilia and stereocilia of the otic vesicle. The white  
 153 asterisks indicate accumulation of App (green) at the base of the cilia bundles. (**B'**) Magnification of cilia outlined  
 154 in (**B**). (**B''**) Increased intensity of the green channel to detect App (arrows) in kinocilia. Otic vesicle in 31hpf  
 155 zebrafish larvae (**C**) with close-up (**C'**) showing App puncta (green) along the kinocilia. Intensity profiles of  
 156 acetylated tubulin (magenta) and App (green) staining from the kinocilia (**D-F**). In (**D**), the intensity profile of the  
 157 whole length of the kinocilium is plotted whereas profiles of cross-section lines are plotted with a visible App  
 158 puncta (**E**) and without (**F**). The dotted lines (**C'**) indicate the kinocilium and cross-sections. Magnification: (**A-**  
 159 **C**)= 40x. Scale bar: (**A**)= 5  $\mu$ m, (**B**)= 10  $\mu$ m, (**B'**)= 4  $\mu$ m, (**B''**)= 2  $\mu$ m, (**C**)= 10  $\mu$ m.



160 ***App localizes to cilia decorating the brain ventricle surface of zebrafish***

161 As APP was previously shown to be expressed by the ependymal cells in rodents and in humans  
162 (32-34), we explored App expression by ependymal cells and App localization at their cilia in  
163 larvae and adult zebrafish (**Figure 3**). At 30 hpf, the brain ventricles are inflated and the  
164 differentiation of motile cilia in the most ventral and dorsal regions have just started but do not  
165 yet contribute to directional CSF flow (35). This facilitates whole-mount imaging and  
166 measurement of single cilium. Using the same combination of antibodies (anti-APP (Y188) and  
167 anti-acetylated tubulin) as above, we could detect App-positive puncta along the acetylated  
168 tubulin signal in most cilia (**Figures 3B,C**). To address if App localization to cilia is maintained  
169 into adulthood, we performed immunofluorescent staining on coronal sections of adult  
170 zebrafish brains using antibodies detecting App (Y188) and acetylated tubulin to label cilia.  
171 Our results showed that consistent to larvae, App was distributed to ependymal cilia in the adult  
172 brain. In contrast to larvae, ependymal cells in adult individuals were covered with multiple  
173 motile cilia. Cryosections of adult zebrafish brain revealed dense cilia tufts with App-positive  
174 staining at the apical side of the ependymal cells (**Figures 3E,F**). Furthermore, App was also  
175 expressed by ependymal cells, similarly to what has previously been described in rodents and  
176 humans (**Figure 3F**). Negative controls did not show any cilia-specific staining  
177 (**Supplementary file 3**).

178

179

**Figure 3.** App is localized to the cilia membrane of neuroepithelium and ependyme in larvae and adult zebrafish

Zebrafish larvae

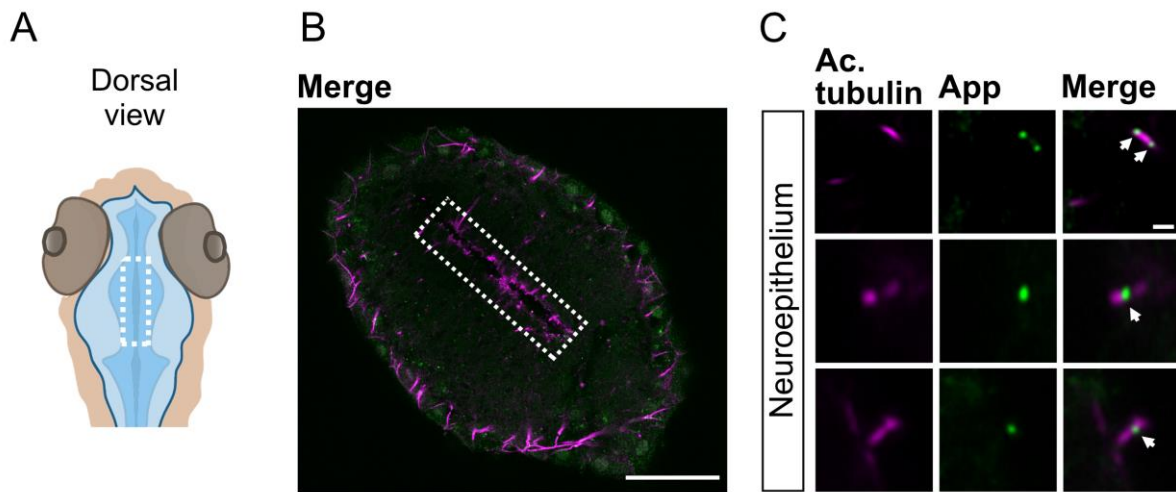

Zebrafish adult

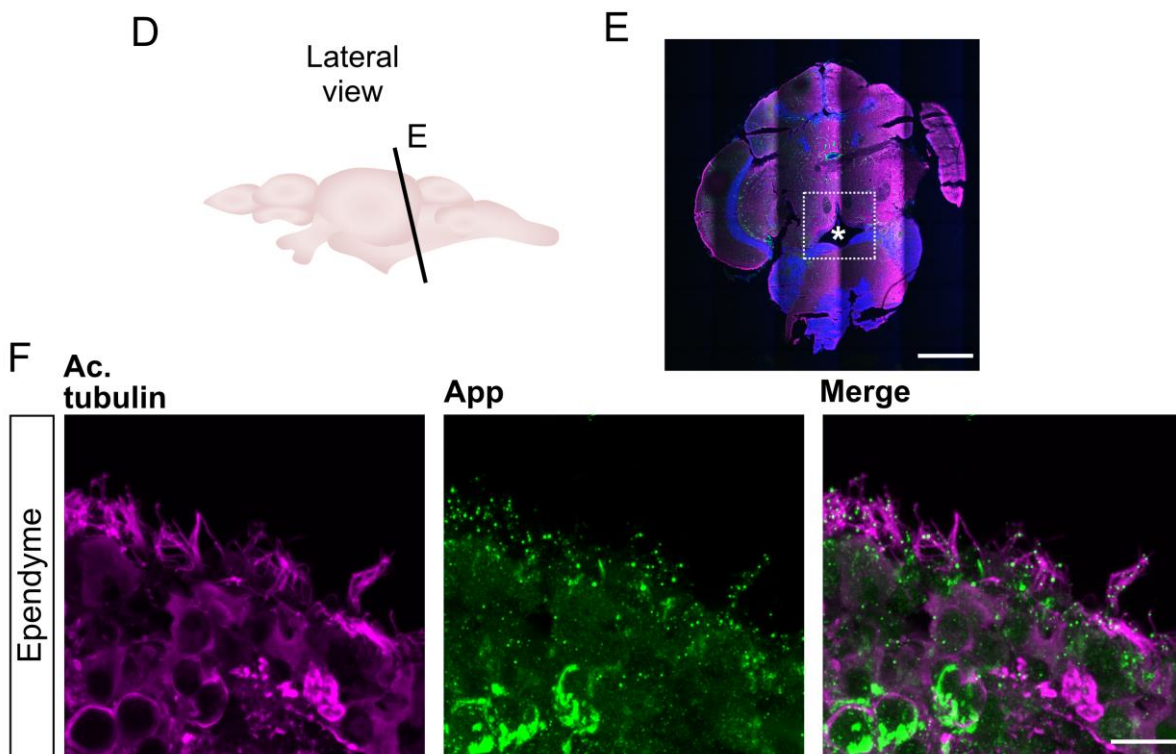

180

181 **Figure 3.** App localizes to the cilia decorating the ventricle of larvae and ependymal cells in adult zebrafish. (A)  
182 Schematic representations of head and ventricle morphology in 30 hpf zebrafish larvae, dorsal view. (B) Dorsal  
183 view of ventricle immunostained for App (green) and acetylated tubulin (magenta) in 30 hpf WT zebrafish larvae.  
184 (C) Close-up of cilia (magenta) and App (green). (D) Schematic outline of adult zebrafish brain, lateral view. (E-  
185 F) Coronal section of adult zebrafish brain and the central canal (see asterisk). Cell nuclei labeled with DAPI  
186 (blue), acetylated tubulin (magenta), App (green). (F) Ependymal motile cilia (magenta) of the central canal with  
187 App (green) accumulation along cilia. Magnification: (B, E)=10x, (C, F)=60x. Scale bar: (B)= 50µm, (C)= 1µm,  
188 (E)= 500µm, (F)= 10µm.

189 ***Conserved localization of APP in ependymal cilia in mouse and human brains***

190 APP is also localized to ependymal cilia in mice and humans. We performed immunostaining  
191 on mouse brain sections using two antibodies directed to APP, Y188 binding to the C-terminal  
192 intra-cellular domain and 22C11 detecting the E1 domain of the N-terminal region (**Figure 6C**),  
193 together with anti-acetylated tubulin. The ependymal motile cilia were easily localized in the  
194 third ventricle of the brain sagittal section (**Figures 4A,B**). Congruent with our results on adult  
195 zebrafish brains, we detected strong APP expression with both antibodies throughout the  
196 ependymal cells layer and punctate APP staining (Y188 see **Figure 4C** and 22C11 see **Figure**  
197 **4D**) overlapping with acetylated tubulin-positive cilia. Interestingly, APP expression by the  
198 choroid plexus cells was detectable (**Figure 4B**). Negative control for primary antibodies was  
199 performed and showed no or weak signal (**Supplementary file 4**).

200

**Figure 4.** APP is localized to the ependymal cilia in adult mouse

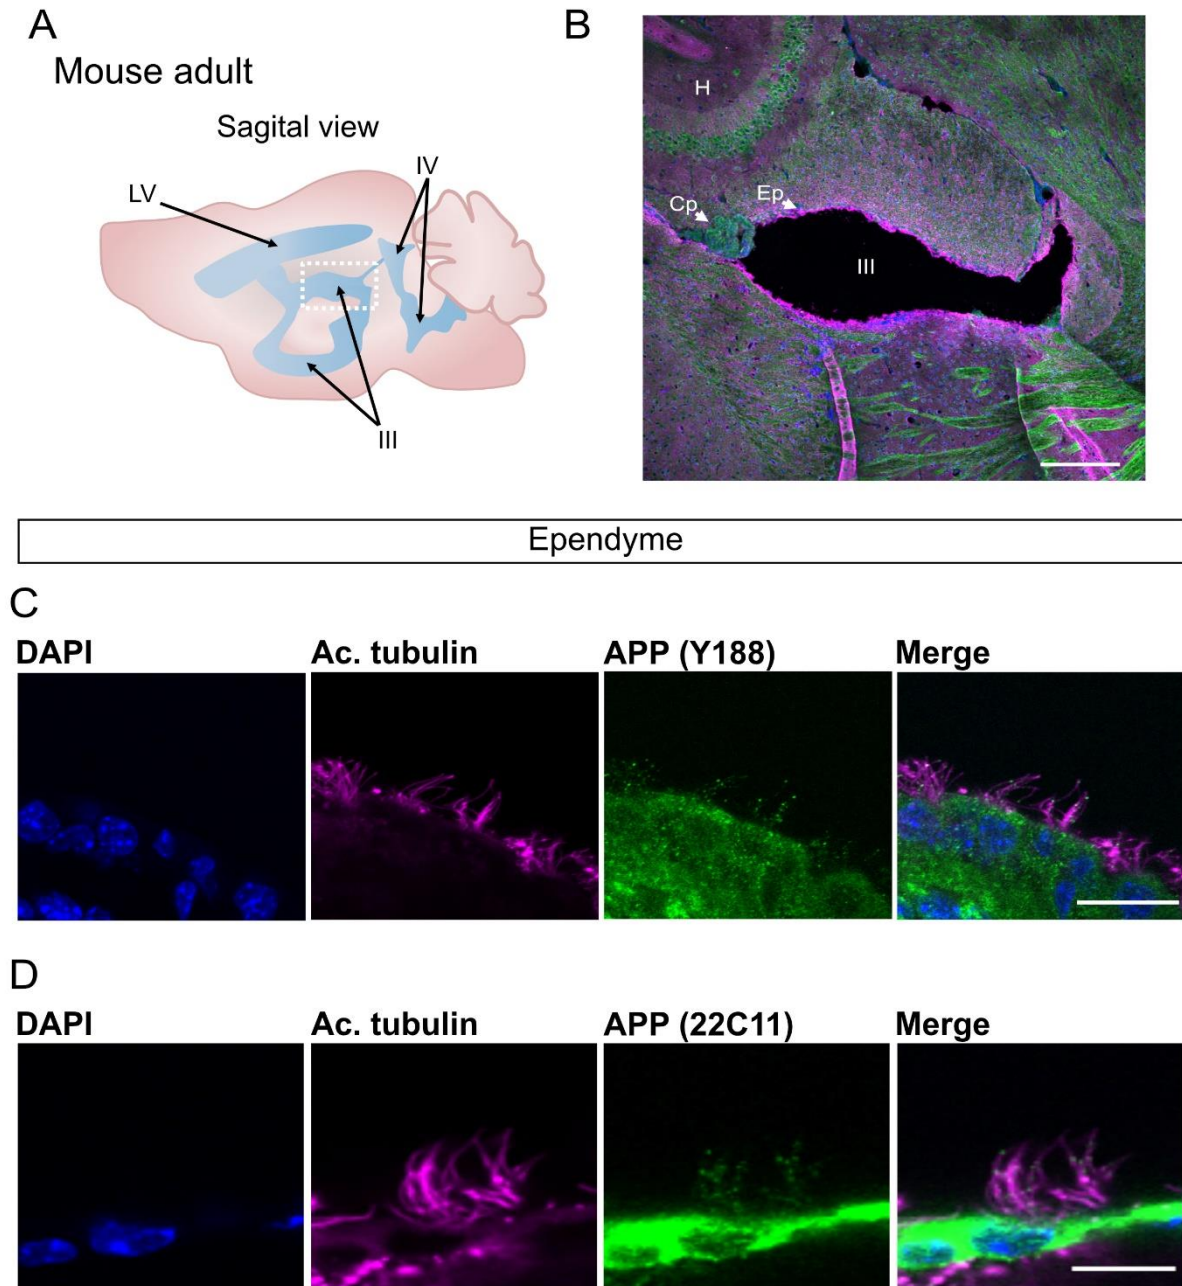

201

202 **Figure 4.** APP is localized to the ependymal cilia in adult mouse. (A) Schematic representation of adult mouse  
203 brain ventricular system, sagittal view. (B) Overview of sagittal section from adult mouse brain and the third  
204 ventricle (see dotted square in (A)) for cell nuclei stained with DAPI (blue), acetylated tubulin (magenta), APP  
205 (green). (C-D) Close-up of ependymal cells and their cilia tufts (magenta) and APP expression with anti-APP  
206 Y188 antibody (C) and 22C11 antibody (D). LV= lateral ventricle, III= third ventricle, IV= fourth ventricle,  
207 H=hippocampus, Cp= choroid plexus, Ep= ependyme. Magnification: (B)=10x, (C,D)=60x. Scale bar: (B)=  
208 200 $\mu$ m, (C,D)= 10 $\mu$ m.  
209

210 In the human brain, acetylated tubulin staining allowed separation of cellular layers of the  
211 caudate nucleus and identification of acetylated tubulin-positive cilia of the ependymal cell  
212 layer lining the lateral ventricle (**Figures 5A,B,D**). However, while many ependymal cells had  
213 intact cilia, many were found broken and dislocated from their cell (**Supplementary file 5**).

214 To address the presence of APP in ependymal cilia, brain serial sections of the caudate nucleus  
215 were incubated with horseradish peroxidase (HRP)-conjugated Y188 or A8717 antibodies, both  
216 recognizing the C-terminal domain of APP. Similarly to our results obtained in mouse and  
217 zebrafish brains, brightfield images confirmed strong APP expression in the ependymal cells  
218 and, upon higher magnification, in ependymal cilia (**Figures 5C,E** , **Supplementary file 5**). In  
219 contrast to zebrafish and mouse, APP in human ependymal cilia was evenly distributed and was  
220 not detected as puncta.

221 In summary, these results show that the expression of APP in the ependymal cells and their cilia  
222 are conserved between species as far apart as zebrafish, mice, and humans.

223



**Figure 5. APP is localized to human brain ependymal cilia**

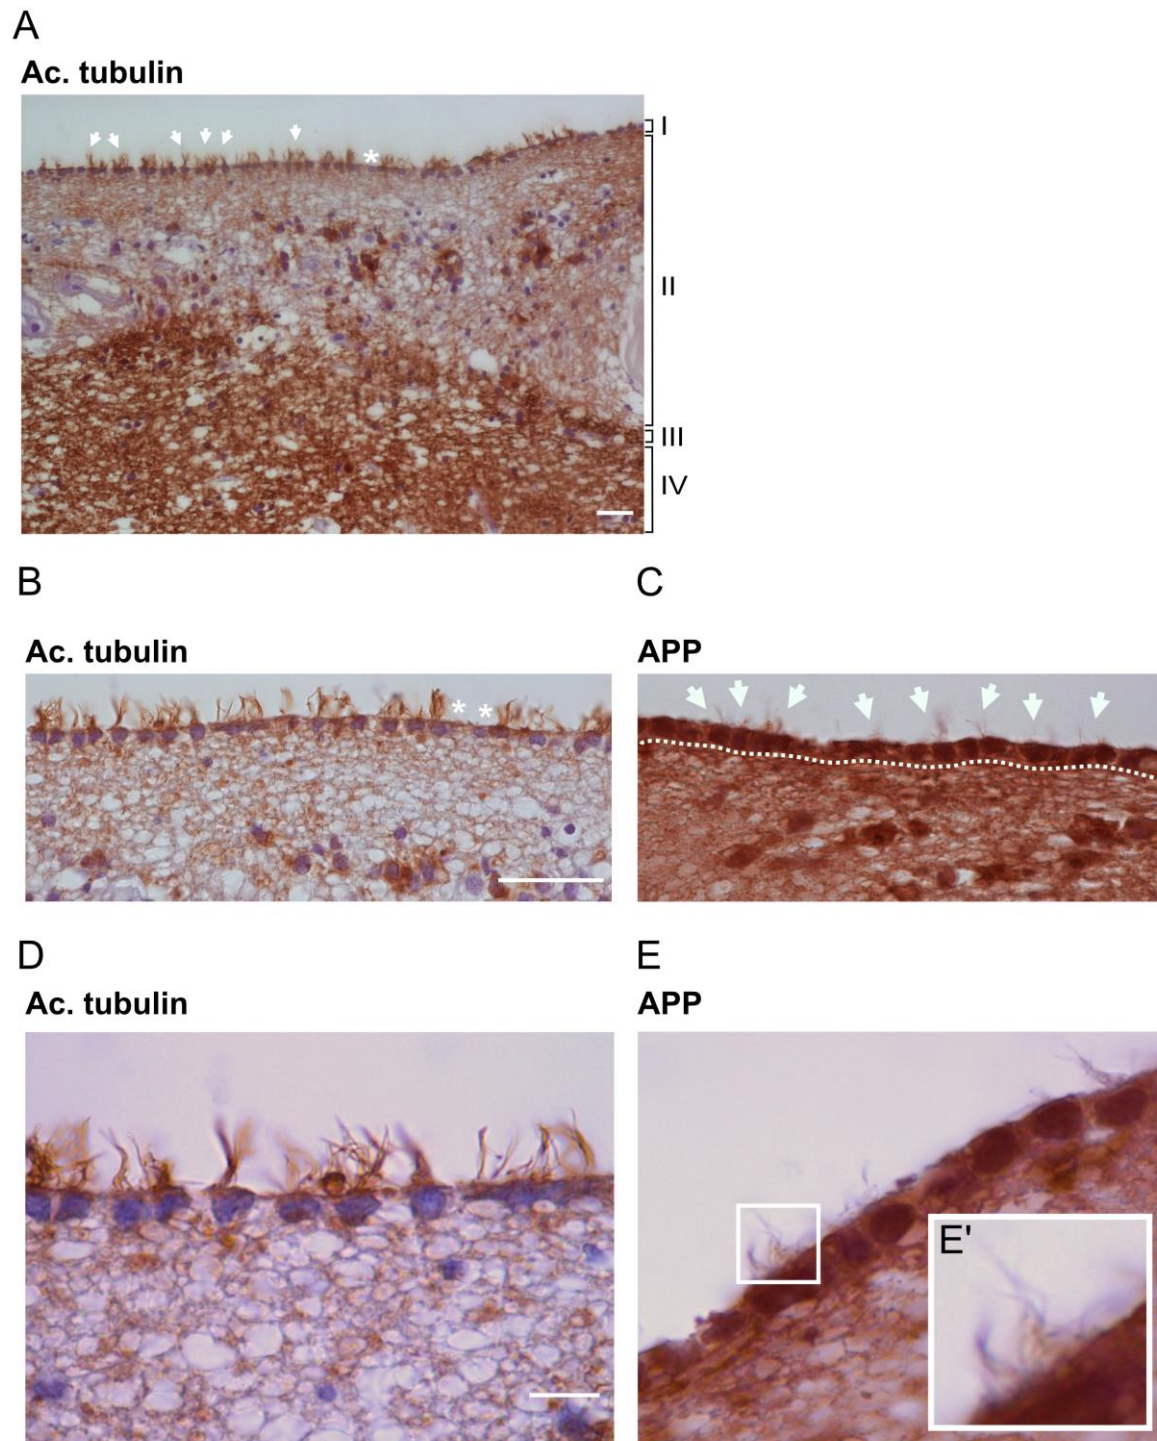

224

225 **Figure 5.** APP is localized to human ependymal cilia. (A) Brightfield overview of a human brain section of the  
226 caudate nucleus immunostained with an anti-acetylated tubulin antibody reveals the different cellular layers (I-  
227 IV): (I) ependyme layer with motile cilia orienting towards the ventricle lumen, (II) cellular extensions connecting  
228 the ependymal cells, (III) cellular layer dense in astrocytes, (IV) brain parenchyma. (B-E) Higher magnifications  
229 of the ependymal layer show clear cilia (acetylated tubulin (B,D)) and APP (Y188 antibody (C,E)) accumulation  
230 within ependymal cells and along ependymal cilia. (E'). Arrows highlight ependymal cilia tufts in the ventricular  
231 lumen. White asterisks indicate broken or absent cilia. Dotted lines delimitate the ependymal cell layer.  
232 Magnification: (A)=20x, (B-C)= 40x, (D-E)= 100x. Scale bar: (A)= 5µm, (B)= 10µm, (D)= 2µm.

233 ***Generation of *appa* and *app* double mutant zebrafish***

234 In contrast to humans and mice, zebrafish have two *APP* orthologues, *appa* and *appb* (together  
235 designated *app*). Zebrafish with mutated *appb* gene was generated and described by our lab  
236 previously (7). However, to investigate the requirement of both App proteins in ciliogenesis,  
237 we used the CRISPR/Cas9 method to generate mutations in the zebrafish *appa* gene (**Figure**  
238 **6A**). A mutation was identified in exon 2 (**Figure 6A**), and Sanger sequencing confirmed a  
239 frame shift mutation of 10 nucleotides (**Figure 6B**). The mutation resulted in a premature stop  
240 codon that is predicted to give rise to a protein truncation at amino acid 109 (**Figure 6C**). The  
241 *appa* mutant allele was outcrossed into the AB background until generation F4 and then bred  
242 with the *appb*<sup>-/-</sup> to generate the double mutant *appa*<sup>-/-</sup>*appb*<sup>-/-</sup> zebrafish line. The *app* mutant  
243 zebrafish were healthy and fertile and did not show any gross morphological phenotypes. qPCR  
244 analysis of genes expression showed very low *appa* and *appb* mRNA levels in the double  
245 mutant fish line (**Figure 6D**). Western blot analysis using the Y188 and 22C11 antibodies with  
246 epitopes in the intracellular and extracellular domain, respectively, showed decreased protein  
247 levels in *app* double-mutant larvae (**Figure 6E**). Both antibodies are likely cross-reacting with  
248 Aplp2 since the epitope sequences are highly similar. These data show that the introduced  
249 mutation in *appa* resulted in a significant decrease of both transcription and translation of the  
250 Appa protein indicating that the mutation give rise to a loss-of-function mutation.

251



**Figure 6. Generation of *appa*<sup>-/-</sup> zebrafish**

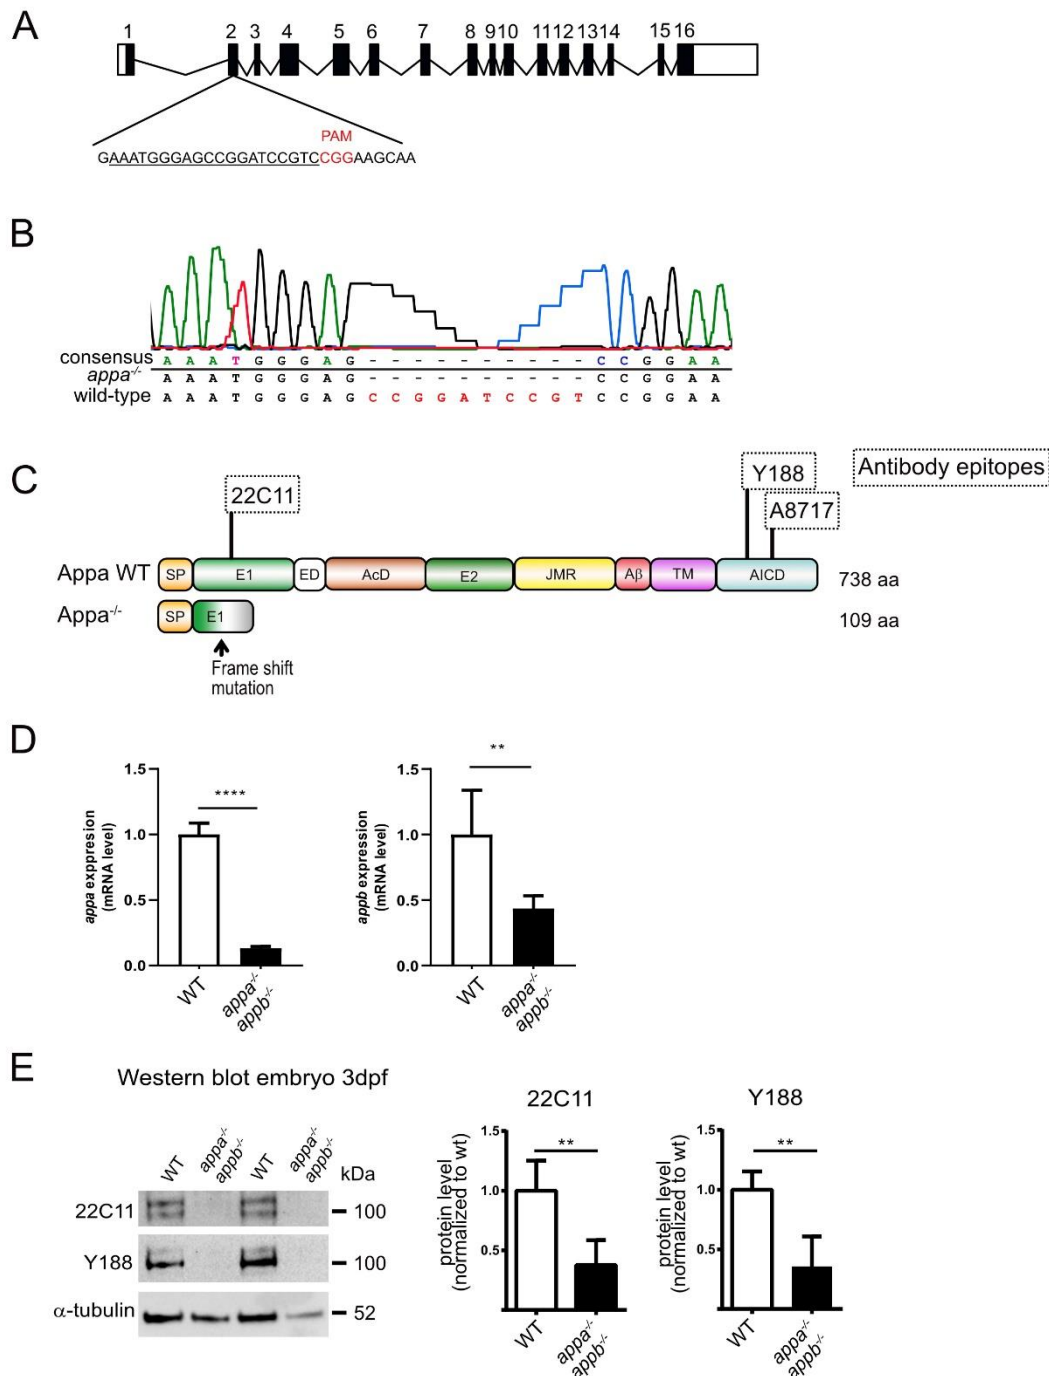

252

253 **Figure 6.** Generation of *appa*<sup>-/-</sup> and analysis of *appa*<sup>-/-</sup>*appb*<sup>-/-</sup> double mutant zebrafish. (A) Schematic outline of  
 254 the *appa* gene with exons (black box) and UTR regions (white box). sgRNA used to target exon 2 with protospacer  
 255 adjacent motif (PAM) in red and the sgRNA target sequence underlined. (B) Sanger sequencing chromatogram of  
 256 exon 2 in wild-type and *appa*<sup>-/-</sup> zebrafish. (C) Schematic drawing of the wild-type Appa protein (738 aa) with  
 257 epitopes of antibodies (dotted squares) used above and the hypothetical truncated Appa (109 aa) protein produced  
 258 in *appa* mutant below. (D) qPCR quantification of *appa* and *appb* mRNA levels in wild-type and *appa*<sup>-/-</sup>*appb*<sup>-/-</sup>  
 259 mutants at 24 hpf. (E) Western blot of 3 dpf whole larvae zebrafish with antibodies against 22C11 and App (Y188).  
 260 Alpha-tubulin is used as loading control. Quantification of band intensity are shown relative to control. Data are  
 261 reported as mean ± SD. \*\*  $\rho < 0.05$ , \*\*\*\*  $\rho < 0.001$ . qPCR n=5, WB n=3. SP= signal peptide, E1= extracellular  
 262 domain, ED= extension domain, AcD= acidic domain, E2= extracellular domain 2, JMR= juxtamembrane region,  
 263 Aβ= amyloid beta, TM= transmembrane, AICD= amyloid intracellular domain.

264 ***Longer brain ventricle cilia in  $appa^{-/-}appb^{-/-}$  larvae***

265 The conserved distribution of APP in brain ventricle cilia prompted us to address the  
266 requirement of App during ciliogenesis. We measured the length of cilia in the midbrain  
267 ventricle detected by acetylated tubulin immunostaining signal in both  $appa^{-/-}appb^{-/-}$  double  
268 mutants and wildtype larvae at 30 hpf. At this stage, the cilia delineating the dorsal and ventral  
269 parts of the diencephalic ventricles are not yet motile (35). A 3D-region of interest (ROI) was  
270 used to measure cilia length. The ROI was established from the dorsal part of the midbrain  
271 ventricle to the ventricular space at a depth of around 25  $\mu\text{m}$ . To our surprise, we found that the  
272 ependymal cilia in the ROI were significantly longer in  $appa^{-/-}appb^{-/-}$  mutants compared with  
273 wild-type larvae (**Figure 7**), which was confirmed by frequency distribution (**Supplementary**  
274 **file 7**).

275

**Figure 7.** Longer cilia of brain ventricle neuroepithelium in *appa*<sup>-/-</sup>*appb*<sup>-/-</sup> larvae zebrafish

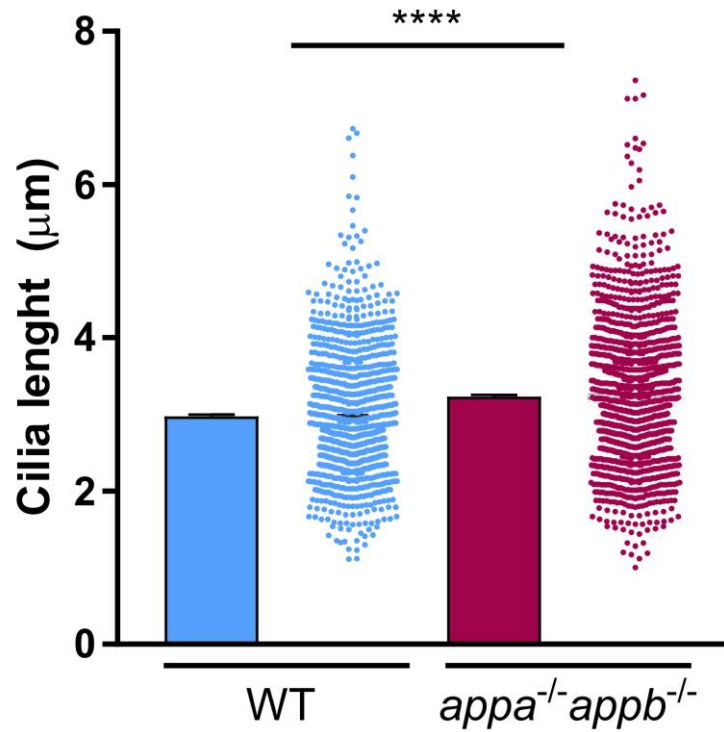

276

277 **Figure 7.** Longer cilia of dorsal brain ventricle neuroepithelium in *appa*<sup>-/-</sup>*appb*<sup>-/-</sup> larvae zebrafish. At 30hpf, *appa*<sup>-/-</sup>*appb*<sup>-/-</sup>  
278 <sup>-/-</sup>*appb*<sup>-/-</sup> exhibit longer diencephalic/mesencephalic ventricle cilia than WT. Data are reported as mean ± SEM.  
279 \*\*\*\*  $\rho < 0.001$ . n=10 WT (1091 cilia), 16 *appa*<sup>-/-</sup>*appb*<sup>-/-</sup> (1511 cilia).

280

281 ***Integrity of ependymal cilia axoneme and microtubule doublets in motile brain ependymal***  
282 ***cilia in *appa*<sup>-/-</sup>*appb*<sup>-/-</sup> mutant adult zebrafish***

283 Emerging from the basal body is the axoneme, which forms the core of the cilium. First  
284 described in the early 1950s with electron microscopy, axonemes are composed of nine  
285 microtubule doublets at the periphery (9+0) (36). In some cilia, an additional central doublet is  
286 expressed (9+2), allowing cilia to generate and regulate movement (37, 38). This central  
287 microtubule doublet is found in motile ependymal cilia (9+2). To better characterize the ciliary  
288 ultrastructure of App-deficient zebrafish, we performed transmission electron microscopy  
289 (TEM) analysis of ependymal cells in adult zebrafish brains. TEM revealed a normal (9 + 2)  
290 axoneme in the cross-sections of ependymal cilia of WT (n=3) brain ventricle (***Figures 8A–D***).  
291 In *appa*<sup>-/-</sup>*appb*<sup>-/-</sup> zebrafish (n=4), ependymal cilia showed normal (9+2) axonemes (***Figures 8E–***  
292 ***H***).

293

**Figure 8. Structural integrity of ependymal cilia in WT and *appa*<sup>-/-</sup>*appb*<sup>-/-</sup> zebrafish**

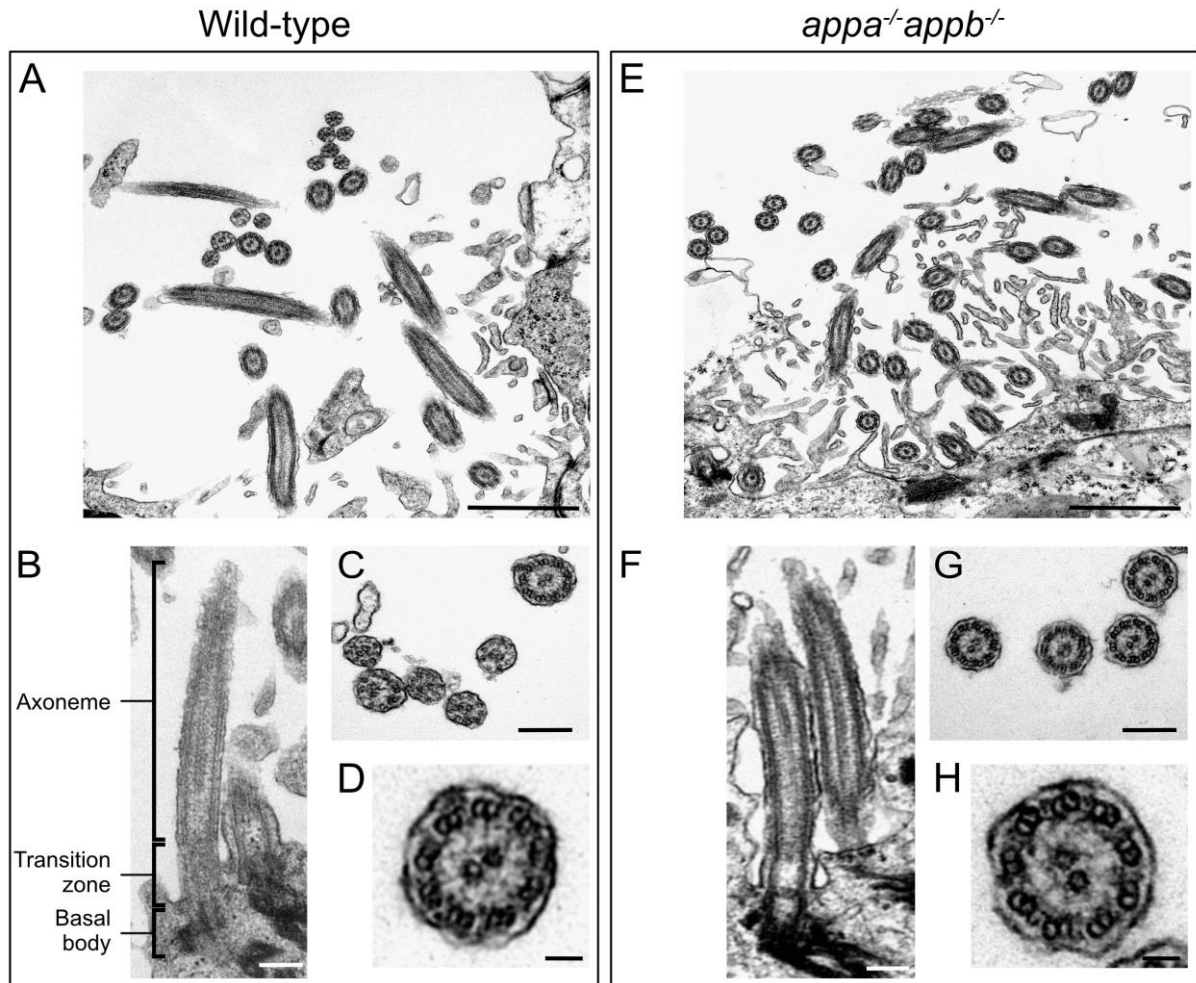

294

295 **Figure 8.** Structural integrity of ependymal cilia in WT and *appa*<sup>-/-</sup>*appb*<sup>-/-</sup> zebrafish. Transmission electron  
296 microscopy of adult zebrafish ependymal cilia of WT (A-D) and *appa*<sup>-/-</sup>*appb*<sup>-/-</sup> mutant (E-H) adult zebrafish. (A,E)  
297 Overview of ependymal cilia of the central canal. (B,F) Longitudinal view on the axoneme of the cilia composing  
298 its core, the transition zone including the ciliary pit between the cilia core and the cellular membrane and the basal  
299 body containing the cilia centrioles, highlighted with increased signal. In (C,G), cross-sections of cilia. (D-H)  
300 Zoom on cross-section of individual cilia showing (9+2) microtubule doublet organization. Scale bar: (A,E)= 1µm,  
301 (B-C, F-G)= 200 nm, (D,H)= 50 nm.

302

303 ***The  $appa^{-/-}appb^{-/-}$  double mutants exhibit smaller diencephalic ventricle***

304 We then went on to address if defects in ependymal cilia affect brain ventricle formation. We  
305 analysed brain ventricle volume and area in 2dpf larvae (**Figure 9A**) and found significant  
306 reductions in both area and volume of the ventricular space in  $appa^{-/-}appb^{-/-}$  compared with  
307 wild-type (**Figure 9B**). These reductions were also observed when only the diencephalic  
308 ventricle was analysed (**Figure 9C**) and compared between both genotypes (**Figure 9D**). The  
309 gross morphology was next determined by measuring the length between specific points and  
310 areas of the ventricles: rostral to caudal, diencephalon ventricle sagittal length, amplitude and  
311 height (**Figure 9E**). However, no significant change was detected compared with wildtype  
312 larvae (**Figure 9F**). These results show that while the overall brain morphology of App mutants  
313 is maintained, their ventricles are smaller.

314



**Figure 9. *appa*<sup>-/-</sup>*appb*<sup>-/-</sup> larvae zebrafish exhibit smaller brain ventricles**

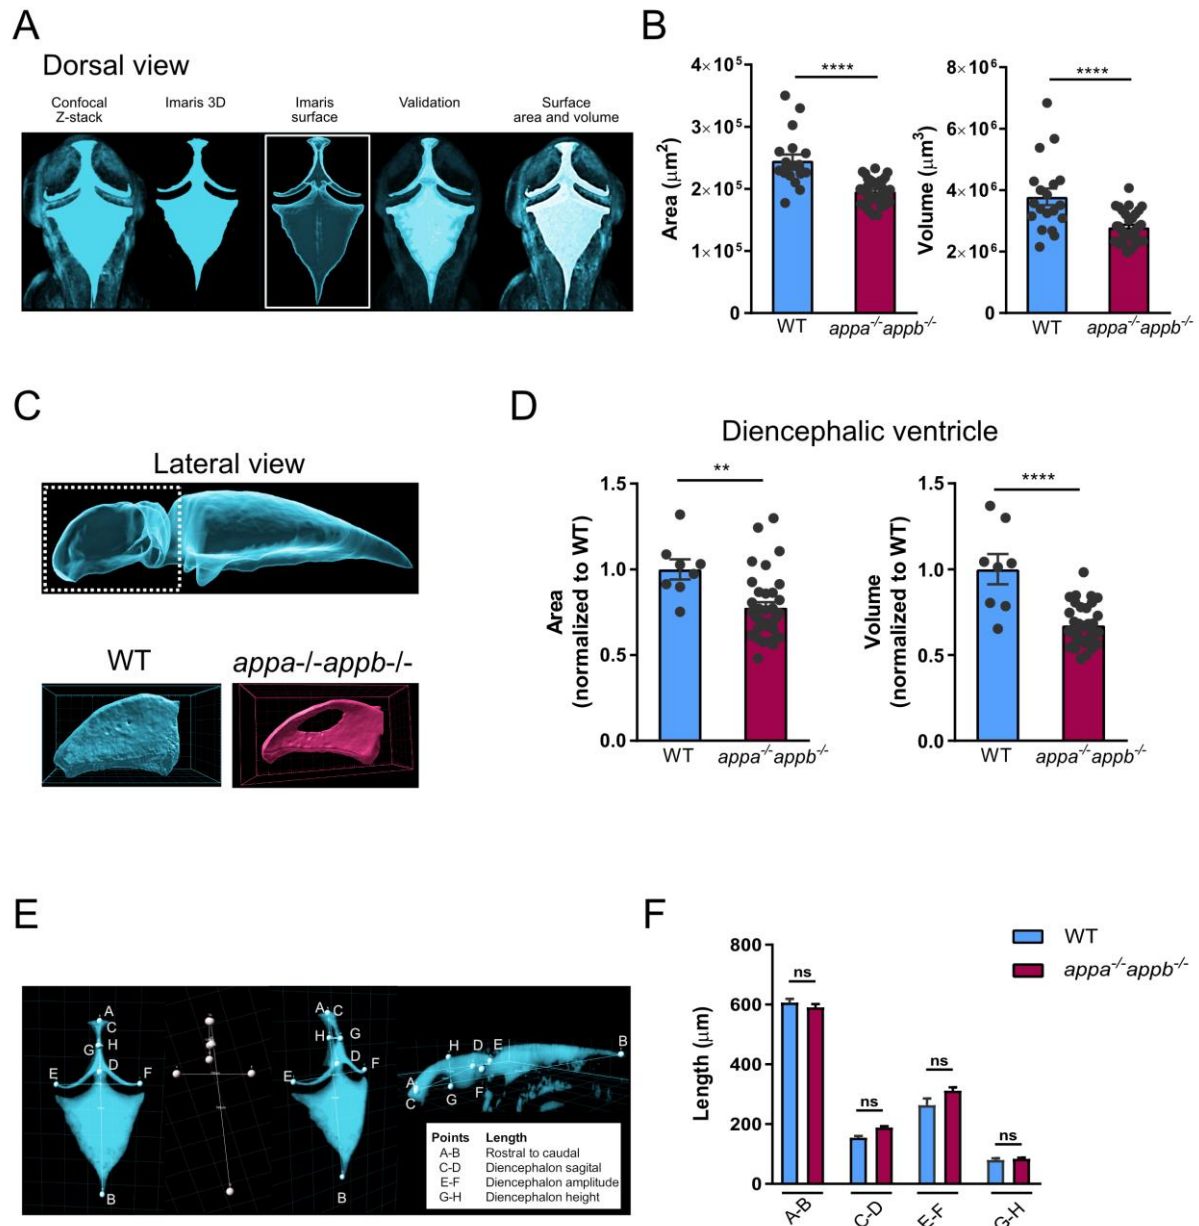

315

316 **Figure 9.** The *appa*<sup>-/-</sup>*appb*<sup>-/-</sup> 2 dpf larvae zebrafish exhibit smaller brain ventricle. Dorsal 3D surface rendering of  
 317 confocal stacks taken from brain ventricles of dextran injected 2 dpf zebrafish larvae (A). Quantification of total  
 318 ventricle surface area and volume show that both are decreased in *appa*<sup>-/-</sup>*appb*<sup>-/-</sup> larvae (B). Lateral 3D surface  
 319 rendering of confocal stacks from brain ventricles of dextran injected 2 dpf zebrafish larvae with close up on  
 320 diencephalic ventricle (C). Quantification of surface area and volume of the diencephalic ventricle in WT and  
 321 *appa*<sup>-/-</sup>*appb*<sup>-/-</sup> larvae (D). Measurement of gross ventricle morphology at 2dpf WT and *appa*<sup>-/-</sup>*appb*<sup>-/-</sup> larvae as the  
 322 length (E). Distance between rostral to caudal, diencephalon ventricle sagittal length, amplitude and height show  
 323 no significant difference in mutants (F). Data are reported as mean  $\pm$  SEM. \*\*  $\rho < 0.01$ , \*\*\*\*  $\rho < 0.001$ . n: (B)  
 324 WT=19, *appa*<sup>-/-</sup>*appb*<sup>-/-</sup> = 34, (D) WT=8, *appa*<sup>-/-</sup>*appb*<sup>-/-</sup> = 34, (F) WT=5, *appa*<sup>-/-</sup>*appb*<sup>-/-</sup> = 4.

325



## 326 *Cilia targeting motifs in App*

327 Many proteins distributed to the cilium carry one or more cilia targeting sequences (CTS). The  
328 most common and well-studied are the VxP and AxxxQ motifs, both of which the requirement  
329 has been shown in transmembrane proteins including opsins (39-41) and somatostatin receptor  
330 3 (SSTR3) (42, 43). The presence of App in cilia therefore made us investigate the presence of  
331 these motifs in App. Interestingly, we found several different CTS motifs with most localized  
332 to the mid- and C-terminal domain of the App protein (*Supplementary file 10*). Furthermore,  
333 most of these are in conserved regions and are thus shared between zebrafish, mouse and human  
334 (*Supplementary file 10*).

335

336

## 337 **Discussion**

338 In this study, we show that App localizes to several different non-motile and motile cilia in  
339 zebrafish larvae including the stereo- and kinocilia of the otic vesicle, motile cilia of olfactory  
340 sensory neurons in the olfactory epithelium and cilia of the ependymal cells lining the brain  
341 ventricles. We also show an evolutionary conserved localization of APP to cilia of the  
342 ependymal cells lining the brain ventricles of adult zebrafish, mice and humans. As these results  
343 indicated a possible function of APP in ciliogenesis or cilia function, we used zebrafish lacking  
344 the two APP orthologues, Appa and Appb, and found longer ependymal cilia and smaller brain  
345 ventricles in larvae zebrafish. Thus, our results suggest that APP not only is distributed to cilia  
346 but also seems to have an important function in ciliogenesis and brain development.

347

348

349 **APP distribution within cilia**

350 We used different antibodies to confirm the localization of App to the cilia. The punctate  
351 localisation of APP indicates that the protein is randomly distributed within the cilium similar  
352 to other membrane receptors such as SSTR3 and Smoothed (Smo) (44, 45). The distribution  
353 of APP within the plasma membrane varies between cell types, nonetheless a recent study  
354 suggested that APP clusters form groups of proteins within the plasma membrane (46). The  
355 similarity with the punctate pattern found here suggests that App may form clusters within the  
356 cilium, at least in zebrafish and mice. In contrast, we observed a continuous rather than punctate  
357 distribution of APP in human ependymal cilia. Whether the observed differences are due to  
358 sample preparation or variations in APP distribution between species remains to be addressed.  
359 Moreover, the accumulation of App at the root of the basal body, as observed in the olfactory  
360 sensory neurons and otic vesicle cilia in larvae zebrafish, correlates with the findings reported  
361 by Yang and Li on APP enrichment along ciliary rootlets (47).

362 The presence of APP within cilia raises the question of how APP is targeted to the cilium. The  
363 cilium membrane is continuous with the plasma membrane, yet it possesses a specific and  
364 conserved composition of proteins and lipids. This specification is considered to be established  
365 through an active transport of ciliary membrane proteins (48) that at least partly depends on  
366 specific ciliary transport sequences (CTSs) within the proteins (49). The presence of several  
367 such CTSs and their conservation between zebrafish, mice and human supports a motif-based  
368 transport of APP to cilia (*Supplementary file 9*). It will therefore be very interesting to address  
369 the extent to which these motifs are required for accumulation of APP at the root of the basal  
370 body and later distribution of APP out to the cilium.

371

372

373 **App in brain ventricles**

374 APP expression by the ependymal cells was first reported in rodents and humans in the late  
375 1980s and early 1990s (32, 33, 50, 51). In line with these findings, our results not only confirm  
376 the expression of App in adult zebrafish ependymal cells, but in addition, show that APP  
377 localizes to ependymal motile cilia in vertebrates as far apart as zebrafish, mice, and humans.  
378 Our finding that loss of App results in morphologically abnormal ependymal cilia suggests a  
379 role of App in ciliogenesis. However, the *appa<sup>-/-</sup>appb<sup>-/-</sup>* mutants gave rise to fertile adults  
380 without major phenotypic changes associated with cilia defects, such as curved body and  
381 hydrocephalus (52-55). In line with our findings, Olstad *et al.* recently reported that such  
382 phenotypes mainly associate with primary cilia defects, while changes in motile cilia were more  
383 likely to result in ventricle duct occlusion (56). During early development, movement of cilia  
384 is a major factor maintaining CSF flow within ventricles. Consequently, the cilia-driven flow  
385 is crucial to form and maintain a proper brain ventricular system, as zebrafish, clawed frog and  
386 mouse ciliary mutants display ventricular defects (56). It is thus likely that the defective  
387 ventricle expansion observed in the *appa<sup>-/-</sup>appb<sup>-/-</sup>* mutant larvae may result from changes in of  
388 motile cilia. Although we did not observe a lack of diffusion between ventricles indicating duct  
389 occlusion, our data suggest that App may be required in motile cilia to promote flow of CSF  
390 needed for ventricle formation during early development (56). The structural changes in cilia  
391 observed in adult *app* mutant zebrafish are similar to those observed in the cilia and flagella-  
392 associated protein (*CFAP43*) mutant mice with a normal pressure hydrocephalus-like  
393 phenotype (57). It will thus be interesting to examine the extent to which cilia movement and  
394 CSF flow change when altering App levels.

395

396

## 397 **The function of App in ependymal cilia**

398 Our findings raise several questions regarding the role of APP in cilia and to which level cellular  
399 processes associated with APP may be mediated through cilia. For example, the multi-ciliated  
400 ependymal cell layer covering the brain ventricles is important for neurogenesis, both by  
401 regulating the number of neural stem cells in the neurogenic niches of the subventricular zone  
402 (51) and by facilitating the migration of new-born neuronal cells through cilia-regulated fluid  
403 dynamics (58). Interestingly, APP is also reported to regulate neurogenesis (59-61) and to  
404 promote neuronal migration (9). Our understanding of APP-mediated processes continues to  
405 increase, but the mechanisms by which these processes are orchestrated are yet not fully  
406 understood. Therefore, the obvious overlap between functions mediated by ependymal cells  
407 and APP makes it tempting to speculate that APP might be important or at least partly required  
408 in ependymal cells to mediate cell migration and proliferation.

409

410 The length of cilia can be modified both by changes in the structural proteins involved in  
411 microtubule assembly but also depends on the cell proliferation and differentiation status, where  
412 proliferating cells generally have shorter cilia than growth arrested cells. As an example,  
413 modulation of several cell cycle-related kinases could alter ciliary length (62). This is true for  
414 primary cilia but to what extent this is valid for other types of cilia is not yet described. The  
415 mechanisms by which App contributes to regulate cilia length is beyond the scope of the present  
416 study but could potentially involve its role in cell differentiation (6).

417 It is intriguing to think of APP in the cilium as a receptor that senses signalling molecules and  
418 metabolites transported through the ventricles by CSF. The hypothesis of APP acting as a  
419 receptor is supported by its similarities with type I membrane receptors and by the fact that the  
420 list of potential APP ligands continues to grow (review by (6)). Therefore, it is tempting to

421 speculate that APP localized on the cilia interacts with CSF-circulating ligands, *e.g.*, A $\beta$   
422 peptides, growth factors, and hormones (6, 63), to mediate CSF-derived signalling.

423

#### 424 **Long-term defects clearance**

425 Beyond the impact of App on ciliogenesis during development, it is intriguing to speculate on  
426 the long-term effects of impaired near-wall CSF propulsion. This movement is thought to play  
427 an important role in removal of waste products from the brain parenchyma (64). Thus, it is  
428 likely that subtle changes in the coordinated beating of cilia may contribute to altered regional  
429 CSF flow that impairs clearance and hence contributes to a slow build-up of waste products  
430 over time. In support are findings that individuals with Down syndrome, expressing  
431 approximately 50% higher levels of APP, have changed CSF flow in the lateral ventricles (65).  
432 Although the morphology of ependymal cilia of DS brains are unknown, *in vitro* cell cultures  
433 show decreased primary cilia length (26). Investigations addressing cilia morphology and  
434 function in the adult zebrafish brain lacking App are ongoing in our lab; however, it will be  
435 equally important to perform these experiments in *app*-knockout mice, as well as in mice  
436 overexpressing APP, which results in altered post-translational processing of the protein.

437

#### 438 **APP fragmentation and CSF biomarkers**

439 The presence of APP in ependymal cells and their cilia also raises the question regarding their  
440 contribution to APP-derived fragments found in CSF. As at least some secretases needed for  
441 APP processing are present in cilia (66), it is likely that the fragments detected in CSF not only  
442 originates from the brain parenchyma but also from APP being processed within the ependymal  
443 cells and the protruding cilia. The release of APP from ependymal cells could be mediated  
444 through the release of extracellular cleavage products or by budding extracellular vesicles and

445 ectosomes. The latter process was in a recent study described as a common mechanism by  
446 which proteins are cleared from cilia instead of recycling by retrograde transport (67). APP-  
447 containing vesicles are released into the CSF (68) and in a recent report, such microvesicles  
448 were found to have lower levels of APP in AD patients compared to healthy individuals (69).  
449 The impact of ependymal integrity and the contribution of cilia-mediated APP release need  
450 further studies but could potentially contribute to our interpretation of biomarkers used to assess  
451 disease progression. Interestingly, a well-established feature of normal pressure hydrocephalus,  
452 where ciliary function is impaired (70), is decreased CSF levels of soluble APP and A $\beta$ , which  
453 are restored upon successful shunt treatment of the condition (71-73).

454

#### 455 **App in otic vesicle and olfactory epithelium**

##### 456 *Olfactory sensory neurons cilia*

457 While others have shown that APP and its processing machinery are expressed in the olfactory  
458 epithelium and bulb in cultured mouse cells (74), we here report App localization also to the  
459 olfactory cilia in larvae zebrafish. Motile cilia of the olfactory sensory neurons (OSNs) in  
460 zebrafish are essential to generate liquid flow in the nose pit to detect odorant molecules (75).  
461 In zebrafish, the olfactory epithelium can be divided into three categories of OSN, *i.e.*, ciliated,  
462 microvillus and crypt OSNs (review by (76)). Each OSN expresses distinct classes of receptors  
463 and sensing molecules and has a specific axonal pathway from the olfactory bulb leading  
464 towards higher olfactory centres in either the telencephalon or the optic tectum. If APP is  
465 present in cilia of all OSN or only a subset, needs to be confirmed. However, the presence of  
466 APP in the olfactory cilia could potentially give clues on corresponding pathways and insights  
467 into the mechanisms resulting in olfactory deficiencies in AD mouse models and  
468 neurodegenerative disease (77).

469 *Otic vesicle cilia*

470 Hearing is a major sensory input in vertebrates, which is known to decrease with aging.  
471 Although the relationship between APP and hearing is less studied than many other areas, there  
472 are a few reports pointing to the loss of hearing associated with APP or its cleavage product A $\beta$   
473 (78-80). Our data, showing the presence of App in cilia mediating hearing, open up the  
474 possibility that nervous system-related changes in hearing may not only be due to defects in the  
475 brain regions receiving input from the auditory organ but also due to direct effects on the cilia.  
476 However, the function of App in the auditory system needs further investigation.

477

478

479 **Conclusion**

480 Altogether, our data show the presence of App in motile and non-motile cilia of the otic vesicle,  
481 olfactory pit and ependymal cells lining the brain ventricles. We also report a conserved  
482 distribution, at least in the ependymal cilia, across vertebrates and that App is required for  
483 proper ciliogenesis and brain ventricle formation. The evolutionary conserved CTSs of APP  
484 and its expression throughout development and aging suggest a central role of APP within the  
485 ependyme. Further studies are required to fully understand the impact of App in cilia in our  
486 olfactory and auditory organs and to which extent defects in ependymal cell integrity and  
487 ciliation contribute to APP-related developmental processes and disease progression.

488



## 489 **Materiel and Methods**

### 490 *Animal care and ethics statement*

491 The zebrafish (*Danio rerio*) facilities and maintenance were approved and follow the guidelines  
492 of the Swedish National Board for Laboratory Animals. Experimental procedures were  
493 approved by the by the ethical committee in Gothenburg. Zebrafish were maintained in Aquatic  
494 Housing Systems (Aquaneering, San Diego, CA) at 28.5 °C, under a 14:10 hour (h) light:dark  
495 cycle at the Institute of Neuroscience and Physiology, University of Gothenburg. Fish were fed  
496 twice daily a diet of live-hatched brine shrimps and Gemma fish food (Skretting, Amersfoort,  
497 Netherlands). System water was created using reverse osmosis water kept at a pH of 7.2-7.6  
498 with NaHCO<sub>3</sub> and coral sand and salt (Instant Ocean, Blacksburg, VA) to maintain the  
499 conductivity at 600µS. Breeding of fish was carried out in 1-2 L breeding tanks and embryos  
500 were collected in embryo medium (EM) (1.0mM MgSO<sub>4</sub>, 0.15mM KH<sub>2</sub>PO<sub>4</sub>, 0.042mM  
501 Na<sub>2</sub>HPO<sub>4</sub>, 1mM CaCl<sub>2</sub>, 0.5mM KCl, 15mM NaCl, 0.7mM NaHCO<sub>3</sub>) and raised in a dark  
502 incubator at 28.5 °C (81).

503 The following fish lines were used in the present project; AB fish from the Zebrafish  
504 international resource centre (ZIRC) or was used for outbreeding and as wild-type background,  
505 *appb*<sup>26-2-/-</sup> (7) and *appa*<sup>-/-</sup> as described below.

506

### 507 *Mutagenesis using the CRISPR/Cas9 system*

508 Genetic mutations in the *appa* gene were introduced using the CRISPR/Cas9 system as  
509 previously described (82). Briefly, gRNAs were generated with a target-specific DNA  
510 oligonucleotide (Integrated DNA Technologies, Leuven, Belgium) containing a T7 promoter  
511 sequence in the 5'-end and a 'generic' DNA oligonucleotide for the guide RNA. The two  
512 oligonucleotides were annealed and extended with Platinum Taq DNA polymerase

513 (ThermoFisher, Waltham, MA), in a final concentration of 1x buffer, 0.25mM dNTP, 0.5 $\mu$ M  
514 of each oligonucleotide and 0.04U/ul Taq with one cycle at the following temperatures (98°C  
515 2 min; 50°C 10 min, 72°C 10 min). The resulting product was analyzed on a 2.5% agarose  
516 (Roche, Basel, Switzerland) gel to confirm a single fragment of 120 basepairs (bp) and used to  
517 transcribe RNA. *In vitro* transcription was performed with the T7 Quick High Yield RNA  
518 Synthesis kit (New England Biolabs, Ipswich, MA) and incubated at 37°C for 16 h. DNA  
519 template was removed with RNase Free DNase at 37°C for 15 min. After purification with the  
520 RNA clean & concentrator-5 (Zymo Research, Irvine, CA), gRNA was analyzed on a 2.5%  
521 agarose gel for integrity and diluted to 250 $\mu$ g/ $\mu$ l with RNase free water and stored at -80°C.  
522 Cas9 protein was diluted to 500nM in Hepes (20mM HEPES, pH7.5; 150mM KCl) and stored  
523 at -80°C. Embryos were co-injected with 50 pg gRNA and 300 pg Cas9 protein at the one to  
524 two cell stage using a microinjector apparatus FemtoJet<sup>®</sup> express (Eppendorf AG, Hamburg,  
525 Germany). Injected embryos were screened for gRNA activity using the T7 endonuclease assay  
526 (New England Biolabs, Ipswich, MA). Ten embryos from each gRNA injection were pooled at  
527 48 hpf and genomic DNA extracted with 50mM NaOH at 95°C for 30 min. M13- and PIG-  
528 tailed primers (IDT, Leuven, Belgium) were used to amplify a region surrounding the mutated  
529 site of each locus using 1x buffer, 2.5mM MgCl<sub>2</sub>, 0.2mM dNTP, 0.2 $\mu$ M primers, 1U Taq  
530 polymerase (Promega, Fitchburg, WI). The polymerase chain reaction (PCR) was purified on  
531 an 1% agarose gel with the QIAquick Gel Extraction Kit (Quiagen, Hilden, Germany) and then  
532 200 ng of the purified PCR product was dissociated and reannealed (95°C for 5min, 95-85°C  
533 at -2°C /s, 85-25°C at 0.1°C /s) in a reaction containing 1x NEB buffer 2 (New England Biolabs,  
534 Ipswich, MA) and then digested with 5U T7 endonuclease I (New England Biolabs, Ipswich,  
535 MA) for one hour at 37°C. Fragments were analyzed on a 2% agarose gel. The remaining  
536 embryos were raised to adulthood and outcrossed with AB wild-type fish. Sixteen embryos  
537 from each outcrossed pair were screened for mutations in the F1 generation using a three-primer

538 fluorescence PCR method. A 300-450 bp region surrounding the target site was amplified using  
539 forward primers linked with a M13 sequence and a PIG-tailed reverse primer in combination  
540 with a generic M13-FAM primer. The *appa*<sup>C21-16</sup> mutants, refer to as *appa*<sup>-/-</sup>, carry a deletion  
541 of -10 bp in exon 2. Sanger sequencing with BigDye™ Terminator v1.1 Cycle Sequencing Kit  
542 (Applied Biosystems™, Waltham, MA) on an ABI3130xl sequencer (SeqGen Inc, Los  
543 Angeles, CA) revealed a deletion of ten nucleotides in exon 2 that likely introduce a frameshift  
544 mutations. Heterozygous mutant carriers were raised and subsequently outcrossed into the wild-  
545 type AB fish line until generation F4. Outcrossed adults were genotyped using M13-FAM  
546 primers and PCR reactions diluted in HiDi™ formamide (Applied Biosystems™, Waltham,  
547 MA) with ROX™500 dye size ladder (ThermoFisher, Waltham, MA) and analyzed for  
548 amplified fragment length polymorphism (AFLP) on an ABI3130xl sequencer. Offspring from  
549 heterozygous F4 inbreeds were inbred to generate homozygous wild-type and mutant lines.  
550 Generation of *appa*<sup>-/-</sup>*appb*<sup>-/-</sup> double mutants were obtain from mating single mutant *appa*<sup>-/-</sup> with  
551 single mutant *appb*<sup>-/-</sup>.

552

### 553 ***Protein sequence alignment***

554 Sequences of APP were obtained from the UniProt database (83) and aligned with ClustalW  
555 using MegAlign Pro v17.2.1 (DNASTar, Inc., Madison, WI) The following sequences were used;  
556 *Homo sapiens* APP751 (P05067-8), *Mus musculus* APP751 (P12023-3), *Danio rerio* Appa738  
557 (Q90W28), Appb751 (B0V0E5). Amino acids conserved across all species were marked with  
558 bright blue background.

559

560 ***Whole-mount fluorescent in situ hybridization***

561 To detect *appa* and *appb* mRNA expression pattern in zebrafish larvae, fluorescent *in situ*  
562 hybridization was performed. Antisense digoxigenin-labeled *appa* and *appb* RNA probes used  
563 are described previously (84). Zebrafish embryos were staged according to Kimmel *et al.* to the  
564 hours post-fertilization (hpf) (85) and manually dechorionated with forceps (Dumont,  
565 Montignez, Switzerland). A treatment with 0.003% PTU (1- phenyl-2-thiourea) (Sigma, St.  
566 Louis, MO) was performed around 23hpf stage to prevent pigmentation. Fluorescent *in situ*  
567 hybridization was performed as described by Lauter *et al.* (86). Briefly, zebrafish larvae were  
568 euthanized in 0.2mg/ml ethyl 3-aminobenzoate methanesulfonate (tricaine) (MS-222, Sigma,  
569 St. Louis, MO) (81) and fixed at 30 hpf in 4% paraformaldehyde (PFA) (Sigma, St. Louis, MO)  
570 for 24h at 4°C. Embryos were washed in phosphate-buffered saline (PBS) with 0.1% Tween-20  
571 (PBST) and dehydrate into increasing methanol (MeOH) gradients from 25 to 100%. Embryos  
572 were incubated in 2% hydrogen peroxide (H<sub>2</sub>O<sub>2</sub>) for 20 min, then gradually rehydrated with  
573 decreasing MeOH gradients. Embryos were incubated in 10µg/ml proteinase K (in 10mM Tris-  
574 HCl pH 8.0, 1.0 mM EDTA) for 10 min at room temperature (RT). The reaction was stopped  
575 with 2 mg/ml glycine in PBST and then the embryos were postfix in 4.0% PFA for 20 min.  
576 PBST washes were performed before incubation in prehybridization buffer (HB; 50% deionized  
577 formamide, 5x saline-sodium citrate (SSC) (3M NaCl, 300 mM tri-sodium citrate, pH 7.0), 5  
578 mg/ml torula RNA (Sigma, St. Louis, MO), 50 µg/ml heparin sodium salt and 0.1% Tween-  
579 20). Embryos were pre-hybridized at 70°C for 1h. Then, hybridization was done with  
580 selectively 50 ng of DIG-labelled *appa* or *appb* RNA in HB with 5% dextran sulfate (Sigma,  
581 St. Louis, MO) at 70 °C overnight. The next day, embryos were washed in warm SSC with  
582 0.1% Tween-20 followed by PBST only. After that, a 1h-blocking incubation at RT in PBST  
583 with 8% goat serum (Sigma, St. Louis, MO) was performed. For the antibody treatment, a  
584 sheep-anti-digoxigenin-peroxidase (POD)-Fab fragments antibody (1:500 in blocking solution)

585 (Roche, Basel, Switzerland) was used and embryos were incubated in the dark overnight at 4°C,  
586 without agitation. To remove excess antibody, embryos were then washed in PBST at RT in  
587 gentle agitation. To amplify the signal, tyramide signal amplification (TSA) was used by  
588 combining 5-carboxyfluorescein succinimidyl ester (Molecular Probes, Eugene, OR) with  
589 tyramine hydrochlorine (Sigma, St. Louis, MO) at a 1.1:1 respective equimolar ratio. Vanillin  
590 (0.45mg/mL) (Sigma, St. Louis, MO) was used as a POD accelerator and diluted in borate  
591 buffer pH 8.5. Embryos were incubated with the TSA and POD accelerator reaction in the dark  
592 without agitation for 15 min at RT. To stop the TSA reaction, embryos were washed in PBST  
593 and then incubate in 100 mM glycine-HCl pH 2.0 to inactivate the POD reaction followed by  
594 additional PBST washing. To avoid shrinkage, embryos were then incubated in an increasing  
595 glycerol gradient (in PBST, 40mM NaHCO<sub>3</sub>). Whole embryos were mounted on glass bottom  
596 35 mm Petri dish (Cellvis, Mountain View, CA) in 1% low-melting agarose (Sigma, St. Louis,  
597 MO). Samples were imaged as stacks using inverted Nikon A1 confocal system (Nikon  
598 Instruments, Melville, NY) using a 20x objective (Plan-Apochromat 20x/0,75) and 40x water-  
599 immersion objective (Apochromat LWD 40x/1,15). Image processing was done using ImageJ  
600 FIJI software (NIH, Bethesda, MD).

601

## 602 *Immunofluorescence*

603

### 604 *Zebrafish larvae*

605 To detect protein expression, immunofluorescence experiments were performed in whole-  
606 mount AB zebrafish larvae. A treatment with 0.003% PTU was performed around 23hpf stage  
607 to prevent pigmentation. Then freshly euthanized embryos were fixed at 30 hpf for 2h in 4%  
608 PFA at RT on slow agitation. After fixation, embryos were washed with PBS with 0.5% Triton-  
609 X (PBTx) at RT. Followed up by incubation in blocking solution (5% goat serum donor herd

610 (GS) (Sigma, St. Louis, MO), 2% bovine serum albumin (BSA) (Sigma, St. Louis, MO) , 1%  
611 DMSO (Sigma, St. Louis, MO) and 0.5% PBTx) for 3h at RT. The larvae were then incubated  
612 overnight at 4°C on slow agitation with the desired primary antibodies in blocking solution:  
613 mouse IgG2b anti-acetylated tubulin monoclonal antibody (1:1000) (Sigma, St. Louis, MO),  
614 recombinant rabbit anti-amyloid precursor protein monoclonal antibody Y188 (1:500) (Abcam,  
615 Cambridge, United Kingdom), and/or mouse anti-glutamylated tubulin monoclonal antibody  
616 (1:1000) (Adipogen, San Diego, CA). The zebrafish larvae used for negative control were  
617 incubated in blocking solution only. The next day, embryos were washed (5x 45min) with  
618 PBSTx at RT and incubated in dark with the specific secondary antibodies overnight at 4°C, in  
619 blocking solution: goat anti-mouse IgG2b Alexa Fluor-647 (1:1000) (Invitrogen Thermo  
620 Fisher, Waltham, MA) and goat anti-rabbit IgG Alexa Fluor-488 (1:1000) (Invitrogen Thermo  
621 Fisher, Waltham, MA), or goat anti-mouse IgG1 Alexa Fluor-568 (1:1000) (Invitrogen Thermo  
622 Fisher, Waltham, MA). The zebrafish larvae used for negative control were also incubated with  
623 the former secondary antibodies. The larvae were then washed with PBTx at RT and incubated  
624 for 15 min with DAPI (1:1000) (ThermoFisher, Waltham, MA) to stain the nuclei in PBS at RT  
625 before the final washes. Stained larvae were mounted in 1% low-melting point agarose, on glass  
626 bottom 35 mm Petri dish.

#### 627 *Adult zebrafish and mouse brains*

628 Brains from adult zebrafish (AB, 2 year-old) and mouse (C57Bl6/n, 8-9 week-old). Brains were  
629 fixed in 4% PFA in PBS overnight at 4°C and then washed and immersed in 30% sucrose  
630 solution in PBS, after which they were frozen in OCT cryomount (Histolab, Askim, Sweden).  
631 Coronal or sagittal cryosections from adult zebrafish (25 µm) and mouse brains (16 µm) slices  
632 were stored at -80°C prior to use. Sections were air dried for 15 min at RT then rehydrated in  
633 PBS. Slices were permeabilized in 0.1% PBTx for 10 min at RT and washed 3x in PBS for  
634 15min each. A 0.1% Sudan Black B (SBB) (Sigma, St. Louis, MO) in 70% EtOH treatment

635 was performed for 20 min at RT. Slides were then washed in PBS for 3x5 min. The slides were  
636 then incubated in blocking solution of 2% GS in PBS at RT for 1h, followed by the incubation  
637 with the primary antibodies in 2% BSA at 4°C overnight: mouse IgG2b anti-acetylated tubulin  
638 monoclonal antibody (1:1000), recombinant rabbit anti-amyloid precursor protein monoclonal  
639 antibody (Y188) (1:500) or mouse anti-amyloid precursor protein A4 antibody (clone 22C11)  
640 (1:500) (Merck Millipore, Burlington, MA), or rabbit IgG (1:500) (Abcam, Cambridge, United  
641 Kingdom) and/or with blocking solution only for negative controls. The next day, slides were  
642 wash 3x in PBS for 15min each and incubated with the secondary antibody in 2% BSA at RT  
643 for 3.5h combined with DAPI (1:1000): goat anti-mouse IgG2b Alexa Fluor-647 (1:1000)  
644 and/or goat-anti rabbit Alexa Fluor-488 (1:1000) and/or goat anti-mouse IgG1 Alexa Fluor-488  
645 (1:1000) (ThermoFisher, Waltham, MA) and/or goat anti-mouse IgG1 Alexa Fluor-568  
646 (1:1000). The slides were then washed 3x15 min in PBS and shortly rinsed in ddH<sub>2</sub>O to remove  
647 any residual salts. The slides were covered with coverslips using ProLong gold antifade  
648 mounting medium (Invitrogen Thermo Fisher, Waltham, MA).

649 Samples were imaged using Zeiss LSM710 inverted confocal microscope (Carl-Zeiss, Jena,  
650 Germany) using 40x water immersion objective (Plan-Apochromat 40x/1.0) and a 63x oil-  
651 immersion objective (Plan-Apochromat 40x/1.0) or with Zeiss LSM880 Airyscan inverted  
652 confocal microscope (Carl-Zeiss, Jena, Germany) using 40x water immersion objective (LCD-  
653 Apochromat 40x/1.0) and 63x oil-immersion objective (Plan-Apochromat 63x/1.4). Image  
654 processing and intensity profiles were performed with ImageJ FIJI program.

655

### 656 ***Human brain sections immunofluorescent staining***

657 Neurologically normal human post-mortem control tissue was obtained from Queen Square  
658 Brain Bank for Neurological Studies. Paraffin-embedded sections were cut from caudate  
659 nucleus brain region, which contains ependymal lining containing cilia. Sections were dewaxed



660 in three changes of xylene and rehydrated using graded alcohols. Endogenous peroxidase  
661 activity was blocked using 0.3% H<sub>2</sub>O<sub>2</sub> in MeOH for 10 min followed by pressure cooker pre-  
662 treatment for 10 min in citrate buffer, pH 6.0. Non-specific binding was blocked using 10%  
663 non-fat dried milk (Sigma-Aldrich, St. Louis, MO) in Tris buffered saline-Tween (TBS-Tween)  
664 before incubating with either anti-acetylated tubulin (1:1000) or anti-APP (1:500) antibodies at  
665 RT for 1 h. A biotinylated mouse anti-rabbit IgG antibody (1:200) (Agilent DAKO, Glostrup,  
666 Denmark) was added for a 30 min incubation with the sections at RT followed by avidin-biotin  
667 complex (Vector Laboratories, Burlingame, CA). Coloration was developed with di-  
668 aminobenzidine (Sigma-Aldrich, St. Louis, MO) activated with H<sub>2</sub>O<sub>2</sub> (87).

669

#### 670 ***Protein extraction from whole zebrafish larvae and western blotting***

671 Protein was extracted from 3dpf double *appa*<sup>-/-</sup>*appb*<sup>-/-</sup> mutant whole larvae (60 larvae per n,  
672 n=3) to confirm loss of protein. Larvae were euthanized, deyolked with ice-cold PBS and snap  
673 frozen in liquid nitrogen prior to use and stored at -80°C. Samples were homogenized in an ice-  
674 cold lysis buffer (10 mM Tris-HCl pH 8.0, 2% sodium deoxycholate, 2% SDS, 1 mM EDTA,  
675 0.5 M NaCl, 15% glycerol) supplemented with protease inhibitors cocktail (Roche, Basel,  
676 Switzerland) and using glass tissue grinder, on ice. Samples were then incubated 20 min on ice,  
677 sonicated for 10 min on max level and centrifuged at 10,000 x g at 4°C. Supernatants were  
678 collected and kept on ice and protein concentration measured with a BCA Protein Assay Kit  
679 (ThermoFisher, Waltham, MA) and samples stored at -80°C. Proteins samples (40-60ug) were  
680 then diluted in a denaturing lysis buffer (1X NuPAGE<sup>®</sup> LDS Sample Buffer (ThermoFisher,  
681 Waltham, MA), 0.05M DTT (Sigma-Aldrich, St. Louis, MO), lysis buffer completed with  
682 protease inhibitors) and then boiled for 5 min at 95°C. Proteins were then separated on a  
683 NuPAGE<sup>®</sup> NOVEX<sup>®</sup> Bis-TRIS pre-cast gel (Invitrogen Thermo Fisher, Waltham, MA) and  
684 transferred onto a 0.2 µm nitrocellulose membrane (GE Healthcare, Chicago, IL). The

685 membrane was incubated in a blocking solution (5% milk) for 2h at RT and then immunoblotted  
686 with the desired primary antibodies overnight at 4°C: rabbit anti-amyloid precursor protein  
687 monoclonal antibody (Y188) (1:2000) or mouse anti-amyloid precursor protein A4 antibody  
688 (clone 22C11) (1:5000) and with a loading concentration control mouse anti-GAPDH-HRP  
689 conjugated (1:20000) (Novus Biologicals, Centennial, CO) or mouse anti- $\alpha$ -tubulin monoclonal  
690 (1:10000) (Sigma, St. Louis, MO). The membrane was then washed in TBS-Tween 3x 10min  
691 at RT and incubated with the secondary antibodies anti-rabbit-HRP (1:5000) (Cell Signaling,  
692 Danvers, MA) for 1h at RT. The membrane was washed 3x10min in TBS-Tween before being  
693 developed. The signal was developed using SuperSignal West Dura Extended Duration  
694 Substrate kit (ThermoFisher, Waltham, MA) and imaged using ChemiDoc Imaging (Bio-Rad,  
695 Hercules, CA). Western blot images were processed and analysed using Image Lab program  
696 (Bio-Rad, Hercules, CA). Quantification of band intensities were performed by Image Lab  
697 (Bio-Rad, Hercules, CA) with GAPDH or alpha-tubulin used to control protein loading.  
698 Samples were normalized to controls.

699

#### 700 ***RNA extraction from whole zebrafish larvae and qPCR***

701 To confirm *appa* and *appb* mRNA levels decrease in our double mutant (*appa*<sup>-/-</sup>*appb*<sup>-/-</sup>), RNA  
702 was extracted from 24 hpf whole larvae (10 larvae per n, n=5). Total RNA was extracted using  
703 TRI Reagent<sup>®</sup> (Sigma, St. Louis, MO). Then, RNA samples were treated with RQ1 RNase-free  
704 DNase 1x reaction buffer and RQ1 RNase-free DNase (Promega, Fitchburg, WI). cDNA was  
705 synthesized using High-Capacity RNA-to-cDNA<sup>™</sup> Kit (Applied Biosystems<sup>™</sup>, Waltham,  
706 MA) with RNase inhibitor and converted in a single-cycle reaction on a 2720 Thermal Cycler  
707 (Applied Biosystems<sup>™</sup>, Waltham, MA). Quantitative PCR was performed with inventoried  
708 TaqMan Gene Expression Assays with FAM reporter dye in TaqMan Universal PCR Master  
709 Mix with UNG (ThermoFisher, Waltham, MA). The assay was carried out on Micro-Amp 96-

710 well optical microtiter plates (ThermoFisher, Waltham, MA) on a 7900HT Fast QPCR System  
711 (Applied Biosystems™, Waltham, MA). qPCR results were analysed with the SDS 2.3 software  
712 (Applied Biosystems™, Waltham, MA). cDNA values from each sample was normalized with  
713 average  $C_T$ 's of house-keeping genes (*eef1a11l1* and *actb1*), then the relative quantity was  
714 determined using the  $\Delta\Delta C_T$  method (88) with the sample of wild-type sibling embryos (24 hpf)  
715 as the calibrator. TaqMan® Gene Expression Assays (Applied Biosystems™, Waltham, MA)  
716 were used for the following genes: amyloid beta (A4) precursor protein A (*appa*)  
717 (Dr03144365\_m1), eukaryotic translation elongation factor 1 alpha 1, like 1 (*eef1a11l1*)  
718 (Dr03432748\_m1) and actin, beta 1 (*actb1*) (Dr03432610\_m1).

719

#### 720 ***Cilia length measurement in zebrafish larvae***

721 To compare the number of brain ependymal cilia and their length, 30 hpf AB wild-type and  
722 *appa*<sup>-/-</sup>*appb*<sup>-/-</sup> zebrafish larvae were used. The larvae were treated with PTU, fixed in 4% PFA  
723 and the immunostaining with antibody against acetylated tubulin was performed as describe in  
724 the section above. Stacks (of around 25µm depending on the angle of the mounted sample) were  
725 taken in the region of interest (ROI) of the dorsal portion of the diencephalic ventricle using  
726 Zeiss LSM710 confocal microscope using inverted 40x water immersion objective (Plan-  
727 Apochromat 40x/1.0). Images were then processed using Imaris (BITPLANE™, Belfast,  
728 United Kingdom) and the cilia length was measured with the acetylated tubulin signal using the  
729 “*measuring points*” tool of the program. Raw data of the measurement were exported to  
730 Microsoft Excel and compiled into GraphPad Prism® 7 for statistical analysis.

731

732 ***Brain ventricles injection and size measurement***

733 To measure the size of the brain ventricles in live zebrafish, 2dpf PTU-treated zebrafish larvae  
734 were used. Rhodamine-Dextran injection protocol was performed as describe by Gutzman and  
735 Sive (89). Briefly, the larvae were anesthetized with tricaine in the EM and transferred onto a  
736 Petri dish covered with 1% agarose, lined with rows moulded. The larvae were kept in EM  
737 complemented with tricaine during the whole procedure and place on a ventral position, with  
738 top of their head facing upwards. Injections were performed using borosilicate injection needles  
739 previously pulled (P-97 Flaming/Brown micropipette puller) (Sutter Instrument, Novato, CA).  
740 Using a microinjector apparatus, 2nl of Rhodamine B isothiocyanate-Dextran (Sigma, St.  
741 Louis, MO) were injected in the hindbrain ventricle without perforating or hitting the brain  
742 tissue below.

743 Larvae with non-effective injections were sorted out using a fluorescent stereomicroscope  
744 (Nikon Instruments, Melville, NY). Quickly after the sorting, the larvae were mounted in 1%  
745 low-melting point agarose on glass bottom 35 mm Petri dish. Confocal imaging stacks were  
746 acquired using an inverted Nikon A1 confocal system using a 20x objective (Plan-Apochromat  
747 20x/0,75). Image processing of the confocal stacks were done with Imaris program. The  
748 “*surface*” tool option was used for each sample. Data of the surface volume and area were  
749 automatically generated by the program. Length measurements of the areas of the ventricles  
750 were obtain manually with the “*measuring tool*”. All data were exported into Microsoft Excel  
751 and GraphPad® 7 Prism for statistical analysis.

752

753 ***Transmission electron microscopy***

754 To evaluate the integrity of the internal structure of the axonemes and microtubules doublets of  
755 the brain motile cilia in older zebrafish, transmission electron microscopy was performed on  
756 fixed brains. Adult zebrafish were euthanized in tricaine and brains dissected, rinsed in ice-cold

757 PBS and fixed in 2% PFA and 2% glutaraldehyde (Sigma, St. Louis, MO), in 0.042M Millonig  
758 buffer (0.081M Na<sub>2</sub>HPO<sub>4</sub>, 0.0183M NaH<sub>2</sub>PO<sub>4</sub>, 0.086M NaCl) pH 7.4 at least 24h at 4°C. After  
759 fixation, brains were cut in two halves and then treated in 2% osmium tetroxide (Sigma, St.  
760 Louis, MO) in 0.1M Millonig buffer pH 7.4. Specimens were then rinsed and incubated  
761 overnight in 4% sucrose solution in 0.1M Millonig buffer pH 7.4 after which they were  
762 dehydrated in series of ethanol and embedded in a mix of acetone and agar 100 resin plastic  
763 (TAAB Laboratories Equipment Ltd, Berks, United Kingdom) and allowed to polymerize for  
764 48h. Blocks were trimmed as semi-thin (1 µm) and ultra-thin (70 nm) sections collected with a  
765 commercial ultramicrotome (Leica EM UC7, Leica Microsystems, Wetzlar, Germany).  
766 Sections were post-stained with 5% uranyl acetate in distilled H<sub>2</sub>O during 40-60 min, rinsed in  
767 distilled H<sub>2</sub>O and then treated with 0.3% Lead Citrate (ThermoFisher, Waltham, MA) for 30-  
768 60 s. Images were acquired using secondary electron detection. Images were acquired with a  
769 Tecnai Spirit BT transmission electron microscope (Field Electron and Ion Company,  
770 Hillsboro, OR).

771

## 772 ***Statistical analysis***

773 Statistical analysis was performed using GraphPad 7 software (Prism®, San Diego, CA). Data  
774 were presented as means with standard deviation ( $\pm$  SD) or standard errors of the mean ( $\pm$   
775 SEM). For analysis of cilia length, D'Agostino & Pearson normality test ( $P < 0.0001$ ) and non-  
776 parametric two-tailed Mann-Whitney U tests were performed. Results related to qPCR and  
777 western blot quantification, and ventricle size measurements were compared statistically using  
778 unpaired Student's t-tests. Statistical significance was set at  $p < 0.05$  (\*), 0.01 (\*\*), 0.005 (\*\*\*)  
779 and 0.0001 (\*\*\*\*).

780

## 781 **Acknowledgements**

782 We thank Elisa Alexandersson and Katarina Turner Stenström for fish maintenance and the  
783 Centre for Cellular Imaging at the University of Gothenburg and the National Microscopy  
784 Infrastructure (VR-RFI 2016-00968) for microscopy support. We also thank Debora Kaminski  
785 for the mouse brains samples, Nathalie Jurish-Yaksi (Norwegian University of Science and  
786 Technology – NTNU) and Jean-François Papon (Public Hospital Network of Paris (AP-HP))  
787 for insight and thoughtful discussions about cilia.

788 **Competing interests:** The authors have no competing interests of relevance to the current  
789 manuscript.

790

## 791 **Additional information**

792 **Funding:** The study was supported by grants from the Swedish Research Council (#2018-  
793 02532), the European Research Council (#681712), Stiftelsen för Gamla Tjänarinnor, and  
794 Hjärnfonden, Sweden. HZ is a Wallenberg Scholar. TL is funded by an Alzheimer’s Research  
795 UK senior fellowship. The Queen Square Brain Bank for Neurological Disorders is supported  
796 by the Reta Lila Weston Institute for Neurological Studies.

797

## 798 **Author contributions**

799 **Jasmine Chebli:** Conceptualization, Formal analysis, Investigation, Visualization,  
800 Methodology, Data curation, Project administration, Writing - original draft, Writing - review  
801 and editing. **Maryam Rahmati, Tammarn Lashley, Anders Oldfors and Birgitta Edeman:**  
802 Formal analysis, Writing - review and editing. **Henrik Zetterberg:** Resources, Supervision,  
803 Funding acquisition, Writing - original draft, Project administration, Writing - review and

804 editing. **Alexandra Abramsson:** Conceptualization, Supervision, Formal analysis,  
805 Investigation, Visualization, Methodology, Writing - original draft, Project administration,  
806 Writing - review and editing. All authors reviewed and approved the final manuscript.

807

808 **Author ORCIDs:** JC: 0000-0003-0791-3198, TL: 0000-0001-7389-0348, AO: 0000-0002-  
809 5758-7397, HZ: 0000-0003-3930-4354, AA: 0000-0002-4715-9225.

810

811

## 812 **Ethics**

813 All animal experiments in this study were performed in accordance with the guidelines of  
814 the Swedish National Board for Laboratory Animals. Ethical approval for the use of human  
815 post-mortem samples was approved by a London Research Ethics Committee and tissue stored  
816 for research under a license from the Human Tissue Authority.

817



818 **Supplementary materials**

**Supplementary file 1. Negative control for whole-mount fluorescent *in situ***

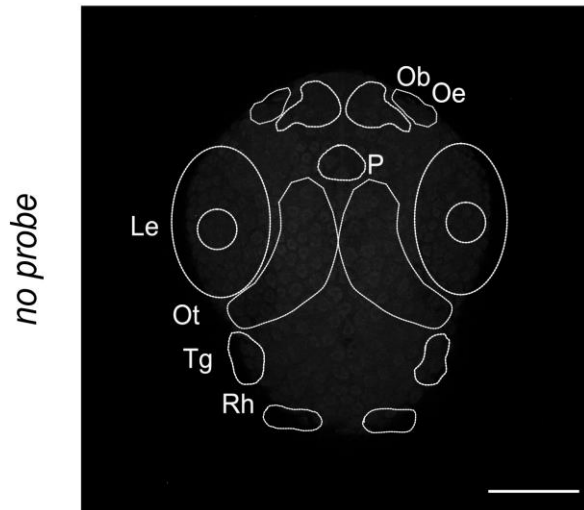

819

820 **Supplementary file 1.** Negative control for whole-mount fluorescent *in situ*. Whole-mount fluorescent *in situ* in  
821 the absence of mRNA probe in 30 hpf WT larvae zebrafish. Maximum projection (77 stacks). T= telencephalic  
822 ventricle, D/M= diencephalic/mesencephalic ventricle, R= rhombencephalic ventricle, Ob= olfactory bulb, Oe=  
823 olfactory epithelium, P= pituitary gland, Le= lens, Ot= optic tectum, Tg= trigeminal ganglia, Rh= rhombomeres,  
824 Ov= otic vesicle. Magnification: 20x. Scale bar: 100µm.

825

**Supplementary File 2.** *Negative controls for immunofluorostaining in larvae zebrafish*

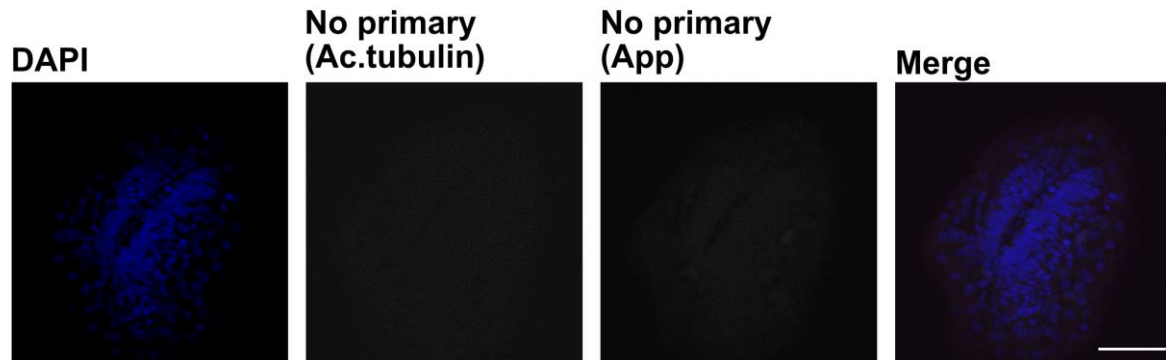

826

827 **Supplementary file 2.** Negative controls for immunofluorescence in larvae zebrafish. Whole-mount  
828 immunofluorescence in larvae zebrafish with secondary antibodies without primary anti-acetylated tubulin and  
829 anti-App primary antibodies. Cell nuclei stained with DAPI (blue). Magnification: 40x. Scale bar: 50 $\mu$ m.

830

**Supplementary File 3. Negative controls for immunofluorostaining in adult zebrafish**

**A**

**Anti-App antibody control**

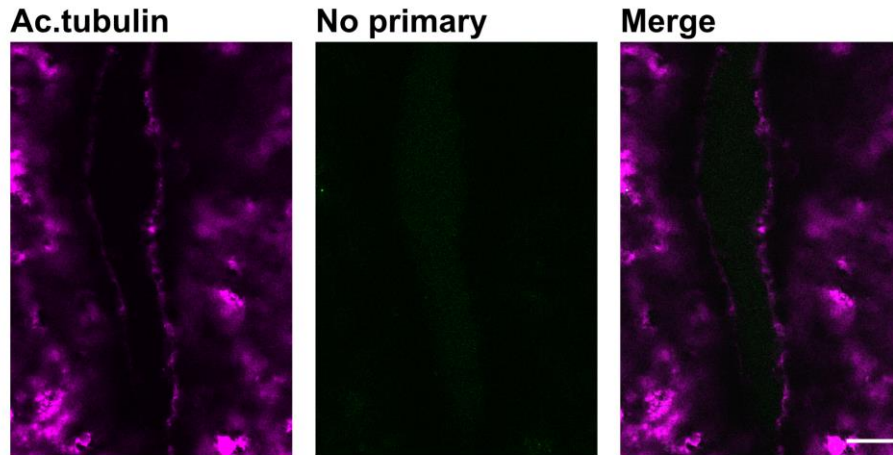

**B**

**IgG rabbit control**

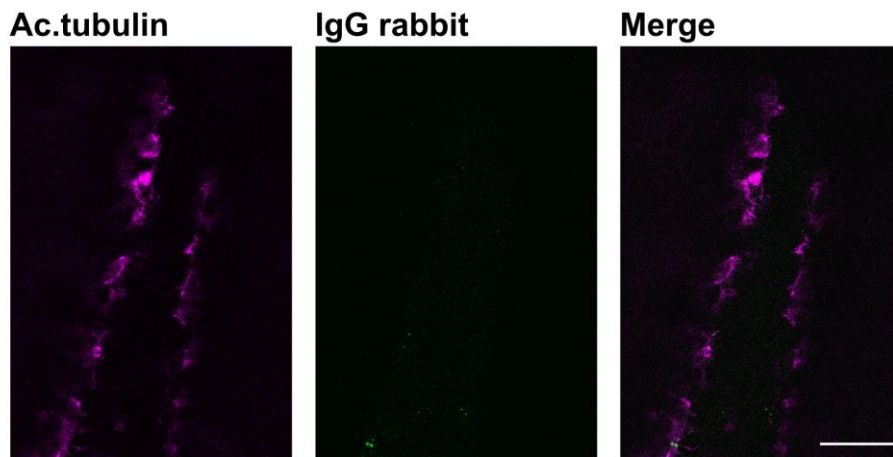

831

832 **Supplementary file 3.** Negative immunofluorescence control in adult zebrafish. Adult zebrafish brain slices  
833 stained with anti-acetylated tubulin antibody and (A) secondary anti-rabbit –Alexa488 antibody (without anti-App  
834 (Y188) antibody) or with (B) rabbit IgG serum and secondary anti-rabbit –Alexa488 antibody. Sec Magnification:  
835 (A-B)= 60x. Scale bar: (A-B)= 20 $\mu$ m.

836

**Supplementary File 4. Negative immunostaining controls in adult mouse**

No primary antibody

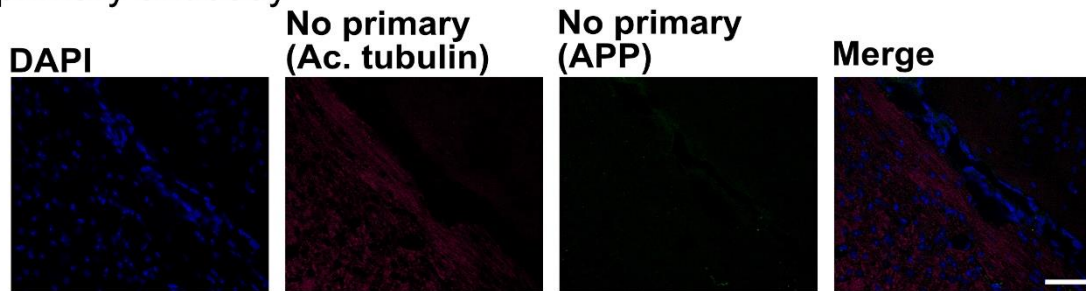

837

838 **Supplementary file 4.** Negative controls of Immunofluorescence staining on adult mouse brain. Slides incubated  
839 without primary antibodies and only with the corresponding secondary antibodies. For cell nuclei with DAPI  
840 (blue). Magnification: 40x. Scale bar: 50µm.

841

**Supplementary file 5. Immunostaining of human brain section with anti-APP (A8717) antibody and damaged cilia after tissue processing**

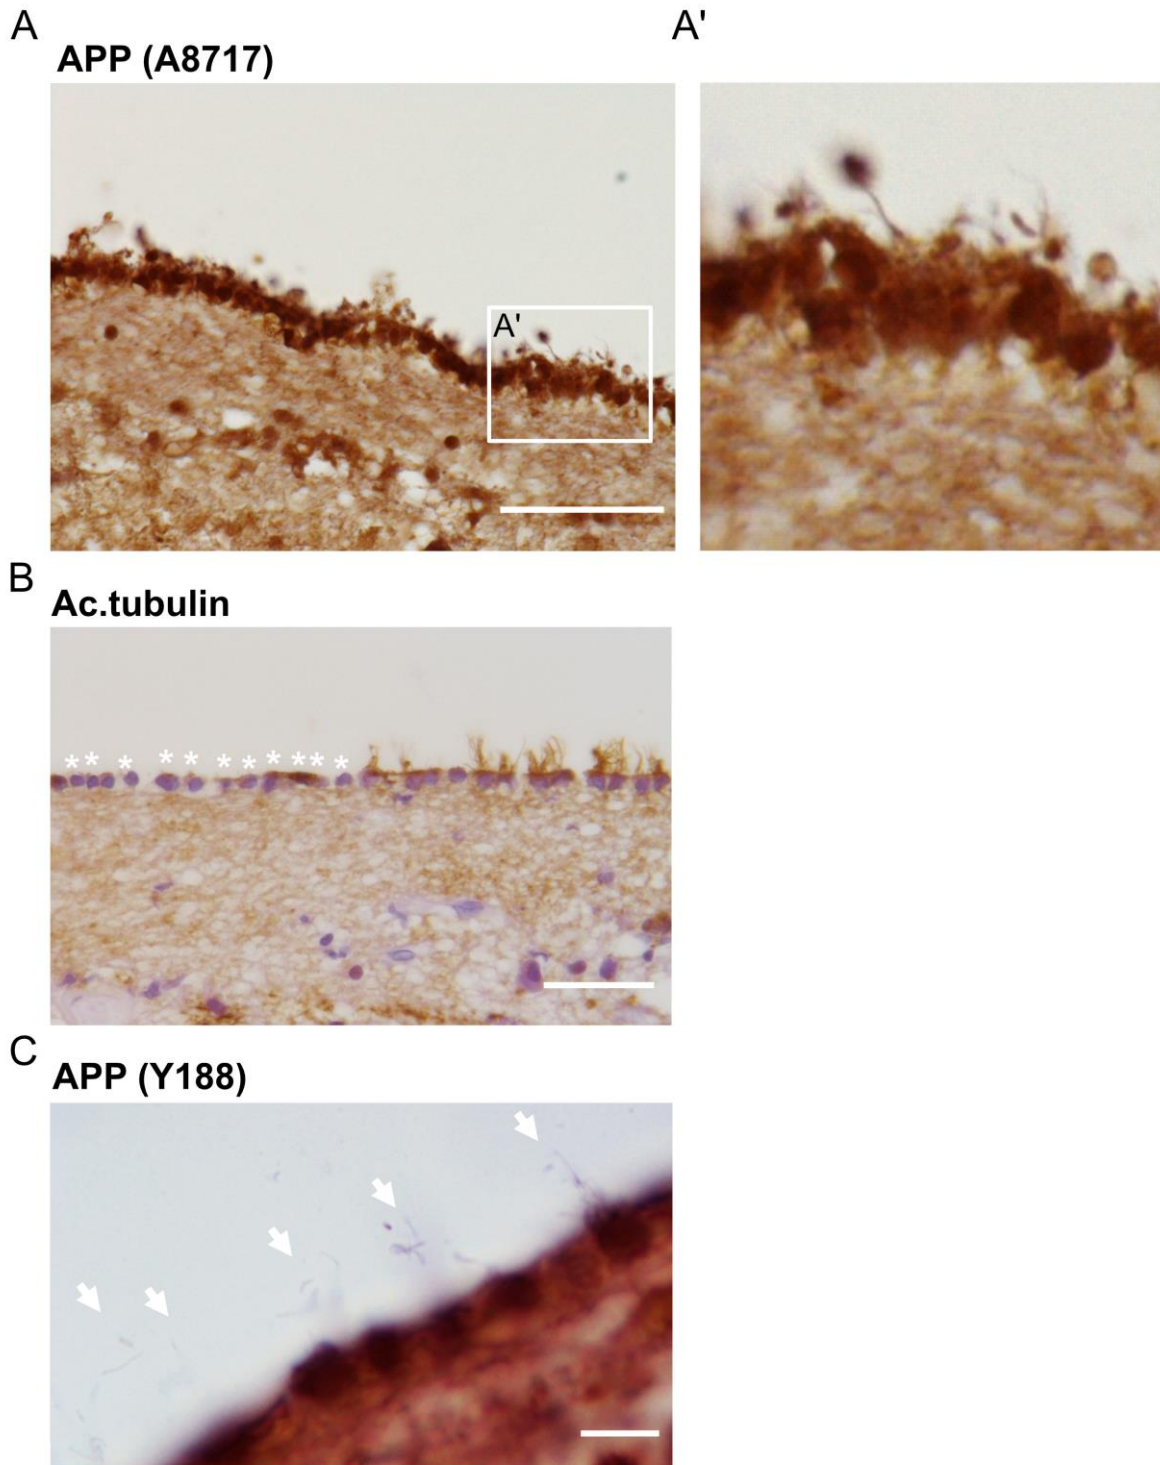

842

843 **Supplementary file 5.** Immunohistochemical staining of APP in human brain section. **(A)** Detection of APP with  
844 anti-APP 8A717 confirms the accumulation of APP within ependymal cells and along ependymal cilia. Close up  
845 in **(A')**. **(B,C)** Sections immunostained with an anti-acetylated tubulin **(B)** or an anti-APP (Y188) **(C)** antibody  
846 reveal that whereas some cilia seem to remain intact, some are completely damaged (see asterisks). White arrows  
847 indicate portions of cilia detached from their ependymal cells **(C)**. Magnification: **(A,B)**= 40x, **(C)**= 100x. Scale  
848 bar: **(A)**= 50  $\mu$ m, **(B)**= 10 $\mu$ m, **(C)**= 2 $\mu$ m.

**Supplementary file 7.** Frequency distribution of the length of brain ventricle in 30hpf larvae zebrafish

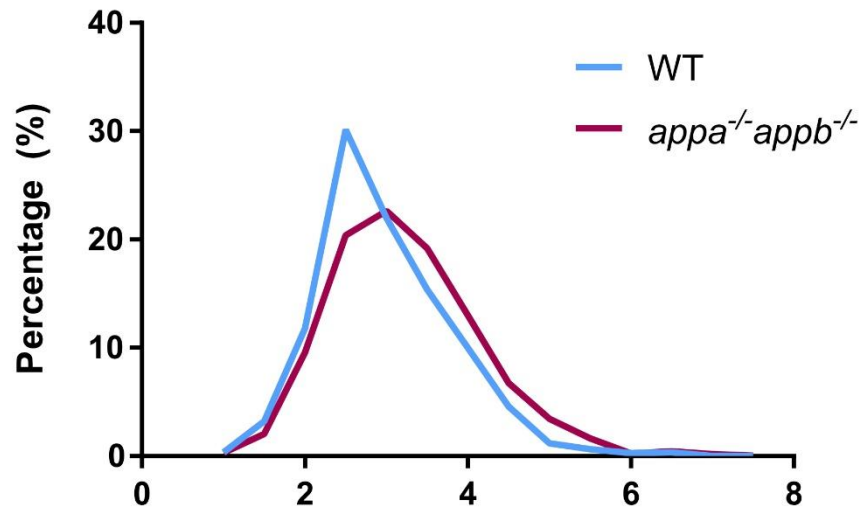

849

850 **Supplementary file 7.** Frequency distribution of cilia length in 30hpf larvae zebrafish diencephalic/mesencephalic  
851 ventricle. A higher percentage of smaller cilia in WT (blue curve) compared to *appa*<sup>-/-</sup>*appb*<sup>-/-</sup> cilia population  
852 (magenta curve). n=10 WT (1091 cilia), n=16 *appa*<sup>-/-</sup>*appb*<sup>-/-</sup> (1511 cilia).

853



## Supplementary file 10. Cilia targeting sequences in human, mouse and zebrafish APP

|         |                                                                                                         |
|---------|---------------------------------------------------------------------------------------------------------|
| Ruler 1 | 1 10 20 30 40 50 60 70 80 90                                                                            |
| hAPP    | --MLPGLALLLLAAWTARALEVPTDGNAGLLAEPQIAMFCGR LNMHMNVQNGKWDSPSGTKTCIDTKEGILQYCQEVPELQITNVVEANQPVTIQNW C    |
| mAPP    | --MLPSLALLLLAAWTVRALLEVPTDGNAGLLAEPQIAMFCGK LNMHMNVQNGKWEVSDPSGKTCIGTKEGILQYCQEVPELQITNVVEANQPVTIQNW C  |
| zAppb   | MGMDRTVFLMLLTTLSLAEVPSDDSVGLLAEPQVAMFCGK LNMHINVQSGKWEVDPDTGKSCISTKEGILQYCQEVYVYDQITNVVEANQPVS IQNW C   |
| zAppa   | --MRSRELFILLMAVASTLAVEVPSDSTGLLAEPQIAMFCGK LNMHINIQSGKWEVDPVSGSKSCIGNKEGILQYCQEVPELQITNVVEANQPVS IWDW C |
| Ruler 1 | 110 120 130 140 150 160 170 180 190                                                                     |
| hAPP    | KRGRKQCKTHPHFVIVPYRCLVGEFVSDALLVPDKCKFLHQERMDVCETHLHWHTVAKETCSEKSTNLHDYGMLLPCGIDKFRGVEFVCCPLAEESDNVDS   |
| mAPP    | KRGRKQCKTHPHFVIVPYRCLVGEFVSDALLVPDKCKFLHQERMDVCETHLHWHTVAKETCSEKSTNLHDYGMLLPCGIDKFRGVEFVCCPLAEESDSVDS   |
| zAppb   | KMGRRCQRSHTHIVVPIYRCLVGEFVSDALLVPDKCKFLHQERMDVCEHSLHWHTVAKESCGRSMNLHDYGMLLPCGIDFRGVEFVCCPMEEQK-LDS      |
| zAppa   | KKSRKQCRSHMHIVVPIYRCLVGEFVSDALLVPDKCKFLHQERMDVCEHSLHWHTVAKESCGRSMNLHDYGMLLPCGIDFRGVEFVCCPADAGKE-SES     |
| Ruler 1 | 210 220 230 240 250 260 270 280 290                                                                     |
| hAPP    | AADAEEDSDVWVGGAADTDYADGSEDKVVEVAEEEEVAVEVEEAEADDED-----DEDGDEVEEAEPE-----YEEATERIT--SIATTTTTTTSVE       |
| mAPP    | AADAEEDSDVWVGGAADTDYADGGEDKVVVEVAEEEEVADVVEEAEADDED-----VEDGDEVEEAEPE-----YEEATERIT--STATTTTTTTSVE      |
| zAppb   | EEQEANSVWVGGAETEYTDASVLEKQVTKPDPVTEDEDLNNEEDQVWDNEDGDEDEEEDDEDIIDEQDTEQTSNIAMTTTTTTTTTTSIE              |
| zAppa   | AAVEEDSDVWVGGAADYDTEMSMTRD---AAAEPAVLDEDEDAEED---EDQDGDGRDEKIEEEEE---EEERTQSTS-AALSTTTTTTTSVE           |
| Ruler 1 | 310 320 330 340 350 360 370 380 390                                                                     |
| hAPP    | EVVREVCSEQAETGPCRAMISRWFYFDVTEGKCAPFFYGGCGGNRRNFDTEEYCMVCGS-AIPTTAASTPDAVDKYLETPGDENEHAHFQKAKERLEAKH    |
| mAPP    | EVVREVCSEQAETGPCRAMISRWFYFDVTEGKCVFFYGGCGGNRRNFDTEEYCMVCGS-VFPTTAASTPDAVDKYLETPGDENEHAHFQKAKERLEAKH     |
| zAppb   | EVVRAVCWAPARSGCHAKLPRWFYVAEKGRCAFTFGGCGGNRRNFESEYCMVCSVSLPTMAPSPADAVDRYLEAPGDI NEHMRVQKAKESLEAKH        |
| zAppa   | EVVREVCFAEAETGPCRAMLSRWYVREERRCAPFIYGGCGGNRRNFESEYCLVCSG-VLPTPSSPPDAVDRYLETADENEHAHFQKAKESLETKH         |
| Ruler 1 | 410 420 430 440 450 460 470 480 490                                                                     |
| hAPP    | RE RMSQVMREWEAEERQAKNLPKADKKAVIQHFQEKVESLEQEAANERQQLVETHMARVEAMLNDRRRLALENYITALQAVPPRPHVFNMLKKYVRAEQ    |
| mAPP    | RE RMSQVMREWEAEERQAKNLPKADKKAVIQHFQEKVESLEQEAANERQQLVETHMARVEAMLNDRRRLALENYITALQAVPPRPHVFNMLKKYVRAEQ    |
| zAppb   | RE KMSVEMREWEAEERQAKNLPKADKKTIIQRQFQEKVESLEKEAAGERQQLVETHMARVEALNDRRRLALESYLSSLSQSDQPRRQVNLNMLKKYVRAEQ  |
| zAppa   | RE RMSQVMREWEAEERQAKSLPRNDKKAVIQHFQEKVEALEQESASERQQLVETHMARVEALNDRRRLALESYLSALQADPPRPHVFNMLKKYVRAEQ     |
| Ruler 1 | 510 520 530 540 550 560 570 580 590                                                                     |
| hAPP    | KDRQHTLKHFEHVRMVDPKKAAQIRSQVMTHLRVIERMNSLSLLYNVPAVAEEIQDEVDLQKEQNYSDDLANMISEPRISYGNALMPSLETETKT         |
| mAPP    | KDRQHTLKHFEHVRMVDPKKAAQIRSQVMTHLRVIERMNSLSLLYNVPAVAEEIQDEVDLQKEQNYSDDLANMISEPRISYGNALMPSLETETKT         |
| zAppb   | KDRQHTLKHFEHVRMVDPKKASQIRPFVMTLRLVIERMNSLGLYKVPQVANDIQDQVAVLVQRDQAEVTQQLSSLSQSKMRSVYGNALMPDLPDSTT       |
| zAppa   | KDRQHTLKHFEHVRMVDPKKAAQIRPQVTLHLRVI EERMNSLGLLYKVPGVADDIQDQVELLQ-REQQEMSAQLANLQSDARVSYGNALMP--DSTA      |
| Ruler 1 | 610 620 630 640 650 660 670 680 690                                                                     |
| hAPP    | TVELLPVNGEFLDDLQPHWVFGADSVPAANTENEVEVPDARPAADRGLTTRPGSGLTNIKTEEISEVKMDAEFRHDSGYEVHHQKLVFFAEDVGSNKGA I   |
| mAPP    | TVELLPVNGEFLDDLQPHWVFGVDSVPANTENEVEVPDARPAADRGLTTRPGSGLTNIKTEEISEVKMDAEFGHDSGFVVRHQKLVFFAEDVGSNKGA I    |
| zAppb   | PLDNLPPPEQ-DGLGF IHP-ESFNQ----ANTDNHVEVPDARPIPERGLPTRP-----EIPKVRLDIEERHNAGYDVRDKRLMFLAEDMGSNKGA I      |
| zAppa   | GLELLPAEDTQGGF IHP-ESFNQ----PNTHNQVEVPDARPVDPDLATRPVSGLK---PDDIPELRMEA EERHS---EVYHQKLVFFAEDVSSNKGA I   |
| Ruler 1 | 710 720 730 740 750 760                                                                                 |
| hAPP    | IGLMVGGVVIATVIVITLVMMLKKKQYTSIHGGVVEVDAAVTPEERHLSKMQQNGYENPTYKFFEQMGN                                   |
| mAPP    | IGLMVGGVVIATVIVITLVMMLKKKQYTSIHGGVVEVDAAVTPEERHLSKMQQNGYENPTYKFFEQMGN                                   |
| zAppb   | IGLMVGGVVIATVIVITLVMMLKKKQYTSIHGGVIEVDAAVTPEERHLAKMQNGYENPTYKFFEQMGN                                    |
| zAppa   | IGLMVGGVVIATVIVITLVMMLKKKQYTSIHGGVIEVDAAVTPEERHLSKMQQNGYENPTYKFFEQMGN                                   |

854

855 **Supplementary file 10.** Cilia targeting sequences in human, mouse and zebrafish APP. Proteins sequence  
 856 alignment of human APP751, mouse APP751 and zebrafish Appa738 and Appb751. Bright blue background  
 857 shows conserved amino acids between species. Cilia targeting sequences AxxxQ (orange boxes) and VxPx (purple  
 858 boxes).  
 859

860



## 861 **References**

- 862 1. Selkoe DJ, Hardy J. The amyloid hypothesis of Alzheimer's disease at 25 years.  
863 *EMBO Mol Med.* 2016;8(6):595-608.
- 864 2. Blennow K, de Leon MJ, Zetterberg H. Alzheimer's disease. *The Lancet.*  
865 2006;368(9533):387-403.
- 866 3. Wang B, Wang Z, Sun L, Yang L, Li H, Cole AL, et al. The Amyloid Precursor  
867 Protein Controls Adult Hippocampal Neurogenesis through GABAergic Interneurons. *Journal*  
868 *of Neuroscience.* 2014;34(40):13314-25.
- 869 4. Caille I, Allinquant B, Dupont E, Bouillot C, Langer A, Muller U, et al. Soluble  
870 form of amyloid precursor protein regulates proliferation of progenitors in the adult  
871 subventricular zone. *Development.* 2004;131(9):2173-81.
- 872 5. Young-Pearse TL, Chen AC, Chang R, Marquez C, Selkoe DJ. Secreted APP  
873 regulates the function of full-length APP in neurite outgrowth through interaction with integrin  
874 beta1. *Neural Dev.* 2008;3:15.
- 875 6. Deyts C, Thinakaran G, Parent AT. APP Receptor? To Be or Not To Be. *Trends*  
876 *Pharmacol Sci.* 2016;37(5):390-411.
- 877 7. Banote RK, Chebli J, Satir TM, Varshney GK, Camacho R, Ledin J, et al.  
878 Amyloid precursor protein-b facilitates cell adhesion during early development in zebrafish.  
879 *Sci Rep.* 2020;10(1):10127.
- 880 8. Wang Z, Wang B, Yang L, Guo Q, Aithmitti N, Songyang Z, et al. Presynaptic  
881 and postsynaptic interaction of the amyloid precursor protein promotes peripheral and central  
882 synaptogenesis. *J Neurosci.* 2009;29(35):10788-801.
- 883 9. Young-Pearse TL, Bai J, Chang R, Zheng JB, LoTurco JJ, Selkoe DJ. A Critical  
884 Function for  $\beta$ -Amyloid Precursor Protein in Neuronal Migration Revealed by In Utero RNA  
885 Interference. *Journal of Neuroscience.* 2007;27(52):14459-69.
- 886 10. Muller UC, Deller T, Korte M. Not just amyloid: physiological functions of the  
887 amyloid precursor protein family. *Nat Rev Neurosci.* 2017;18(5):281-98.
- 888 11. Haass C, Kaether C, Thinakaran G, Sisodia S. Trafficking and proteolytic  
889 processing of APP. *Cold Spring Harb Perspect Med.* 2012;2(5):a006270.
- 890 12. Brown JM, Witman GB. Cilia and Diseases. *Bioscience.* 2014;64(12):1126-37.
- 891 13. Park SM, Jang HJ, Lee JH. Roles of Primary Cilia in the Developing Brain. *Front*  
892 *Cell Neurosci.* 2019;13:218.
- 893 14. Spassky N, Merkle FT, Flames N, Tramontin AD, Garcia-Verdugo JM, Alvarez-  
894 Buylla A. Adult ependymal cells are postmitotic and are derived from radial glial cells during  
895 embryogenesis. *J Neurosci.* 2005;25(1):10-8.
- 896 15. Lechtreck KF, Delmotte P, Robinson ML, Sanderson MJ, Witman GB. Mutations  
897 in *Hydin* impair ciliary motility in mice. *J Cell Biol.* 2008;180(3):633-43.
- 898 16. Abbott NJ, Pizzo ME, Preston JE, Janigro D, Thorne RG. The role of brain  
899 barriers in fluid movement in the CNS: is there a 'glymphatic' system? *Acta Neuropathol.*  
900 2018;135(3):387-407.
- 901 17. Ethell DW. Disruption of cerebrospinal fluid flow through the olfactory system  
902 may contribute to Alzheimer's disease pathogenesis. *J Alzheimers Dis.* 2014;41(4):1021-30.
- 903 18. Kapoor KG, Katz SE, Grzybowski DM, Lubow M. Cerebrospinal fluid outflow:  
904 an evolving perspective. *Brain Res Bull.* 2008;77(6):327-34.
- 905 19. Klein S, Goldman A, Lee H, Ghahremani S, Bhakta V, Center UCG, et al.  
906 Truncating mutations in APP cause a distinct neurological phenotype. *Ann Neurol.*  
907 2016;80(3):456-60.

- 908 20. Kiprilov EN, Awan A, Desprat R, Velho M, Clement CA, Byskov AG, et al.  
909 Human embryonic stem cells in culture possess primary cilia with hedgehog signaling  
910 machinery. *J Cell Biol.* 2008;180(5):897-904.
- 911 21. Magara F, Muller U, Li ZW, Lipp HP, Weissmann C, Stagljar M, et al. Genetic  
912 background changes the pattern of forebrain commissure defects in transgenic mice  
913 underexpressing the  $\alpha$ -amyloid-precursor protein. *Proceedings of the National Academy of*  
914 *Sciences.* 1999;96(8):4656-61.
- 915 22. Baudoin JP, Viou L, Launay PS, Luccardini C, Espeso Gil S, Kiyasova V, et al.  
916 Tangentially migrating neurons assemble a primary cilium that promotes their reorientation to  
917 the cortical plate. *Neuron.* 2012;76(6):1108-22.
- 918 23. Guo J, Otis JM, Higginbotham H, Monckton C, Cheng J, Asokan A, et al. Primary  
919 Cilia Signaling Shapes the Development of Interneuronal Connectivity. *Dev Cell.*  
920 2017;42(3):286-300 e4.
- 921 24. Higginbotham H, Guo J, Yokota Y, Umberger NL, Su CY, Li J, et al. Arl13b-  
922 regulated cilia activities are essential for polarized radial glial scaffold formation. *Nat Neurosci.*  
923 2013;16(8):1000-7.
- 924 25. Guo J, Otis JM, Suciú SK, Catalano C, Xing L, Constable S, et al. Primary Cilia  
925 Signaling Promotes Axonal Tract Development and Is Disrupted in Joubert Syndrome-Related  
926 Disorders Models. *Developmental Cell.* 2019;51(6):759-74.e5.
- 927 26. Galati DF, Sullivan KD, Pham AT, Espinosa JM, Pearson CG. Trisomy 21  
928 Represses Cilia Formation and Function. *Dev Cell.* 2018;46(5):641-50 e6.
- 929 27. Chakravarthy B, Gaudet C, Ménard M, Brown L, Atkinson T, LaFerla FM, et al.  
930 Reduction of the immunostainable length of the hippocampal dentate granule cells' primary  
931 cilia in 3xAD-transgenic mice producing human A $\beta$ 1-42 and tau. *Biochemical and Biophysical*  
932 *Research Communications.* 2012;427(1):218-22.
- 933 28. Ibanez-Tallon I, Pagenstecher A, Fliegau M, Olbrich H, Kispert A, Ketelsen UP,  
934 et al. Dysfunction of axonemal dynein heavy chain Mdnah5 inhibits ependymal flow and  
935 reveals a novel mechanism for hydrocephalus formation. *Hum Mol Genet.* 2004;13(18):2133-  
936 41.
- 937 29. Vorobyeva AG, Saunders AJ. Amyloid-beta interrupts canonical Sonic hedgehog  
938 signaling by distorting primary cilia structure. *Cilia.* 2018;7:5.
- 939 30. Musa A, Lehrach H, Russo VA. Distinct expression patterns of two zebrafish  
940 homologues of the human APP gene during embryonic development. *Dev Genes Evol.*  
941 2001;211(11):563-7.
- 942 31. Tanimoto M, Ota Y, Inoue M, Oda Y. Origin of inner ear hair cells: morphological  
943 and functional differentiation from ciliary cells into hair cells in zebrafish inner ear. *J Neurosci.*  
944 2011;31(10):3784-94.
- 945 32. Kawarabayashi T, Shoji M, Harigaya Y, Yamaguchi H, Hirai S. Amyloid beta/A4  
946 protein precursor is widely distributed in both the central and peripheral nervous systems of the  
947 mouse. *Brain Res.* 1991;552(1):1-7.
- 948 33. Ohta M, Kitamoto T, Iwaki T, Ohgami T, Fukui M, Tateishi J.  
949 Immunohistochemical distribution of amyloid precursor protein during normal rat  
950 development. *Brain Res Dev Brain Res.* 1993;75(2):151-61.
- 951 34. Stern RA, Otvos L, Jr., Trojanowski JQ, Lee VM. Monoclonal antibodies to a  
952 synthetic peptide homologous with the first 28 amino acids of Alzheimer's disease beta-protein  
953 recognize amyloid and diverse glial and neuronal cell types in the central nervous system. *Am*  
954 *J Pathol.* 1989;134(5):973-8.
- 955 35. Fame RM, Chang JT, Hong A, Aponte-Santiago NA, Sive H. Directional  
956 cerebrospinal fluid movement between brain ventricles in larval zebrafish. *Fluids Barriers CNS.*  
957 2016;13(1):11.

- 958 36. Manton I.; Clarke B. An electron microscope study of the spermatozoid  
959 of sphagnum. *Journal of Experimental Botany*. 1952;3:265–75.  
960 37. Satir P. Studies on cilia: II. Examination of the distal region of the  
961 ciliary shaft and the role of the filaments in motility. *Journal of Cell*  
962 *Biology*. 1965(26):805–34.  
963 38. Satir P, Heuser T, Sale WS. A Structural Basis for How Motile Cilia Beat.  
964 *Bioscience*. 2014;64(12):1073-83.  
965 39. Tam BM, Moritz OL, Hurd LB, Papermaster DS. Identification of an outer  
966 segment targeting signal in the COOH terminus of rhodopsin using transgenic *Xenopus laevis*.  
967 *J Cell Biol*. 2000;151(7):1369-80.  
968 40. Deretic D. A role for rhodopsin in a signal transduction cascade that regulates  
969 membrane trafficking and photoreceptor polarity. *Vision Research*. 2006;46(27):4427-33.  
970 41. Rakoczy EP, Kiel C, McKeone R, Stricher F, Serrano L. Analysis of disease-  
971 linked rhodopsin mutations based on structure, function, and protein stability calculations. *J*  
972 *Mol Biol*. 2011;405(2):584-606.  
973 42. Berbari NF, Johnson AD, Lewis JS, Askwith CC, Mykityn K. Identification of  
974 ciliary localization sequences within the third intracellular loop of G protein-coupled receptors.  
975 *Mol Biol Cell*. 2008;19(4):1540-7.  
976 43. Domire JS, Green JA, Lee KG, Johnson AD, Askwith CC, Mykityn K. Dopamine  
977 receptor 1 localizes to neuronal cilia in a dynamic process that requires the Bardet-Biedl  
978 syndrome proteins. *Cell Mol Life Sci*. 2011;68(17):2951-60.  
979 44. Chakravarthy B, Gaudet C, Menard M, Atkinson T, Chiarini A, Dal Pra I, et al.  
980 The p75 neurotrophin receptor is localized to primary cilia in adult murine hippocampal dentate  
981 gyrus granule cells. *Biochem Biophys Res Commun*. 2010;401(3):458-62.  
982 45. Ye F, Breslow DK, Koslover EF, Spakowitz AJ, Nelson WJ, Nachury MV. Single  
983 molecule imaging reveals a major role for diffusion in the exploration of ciliary space by  
984 signaling receptors. *eLife*. 2013;2.  
985 46. de Coninck D, Schmidt TH, Schloetel JG, Lang T. Packing Density of the  
986 Amyloid Precursor Protein in the Cell Membrane. *Biophys J*. 2018;114(5):1128-41.  
987 47. Yang J, Li T. The ciliary rootlet interacts with kinesin light chains and may  
988 provide a scaffold for kinesin-1 vesicular cargos. *Exp Cell Res*. 2005;309(2):379-89.  
989 48. Long H, Huang K. Transport of Ciliary Membrane Proteins. *Frontiers in Cell and*  
990 *Developmental Biology*. 2020;7.  
991 49. Malicki J, Avidor-Reiss T. From the cytoplasm into the cilium: bon voyage.  
992 *Organogenesis*. 2014;10(1):138-57.  
993 50. Mita S, Schon EA, Herbert J. Widespread expression of amyloid beta-protein  
994 precursor gene in rat brain. *Am J Pathol*. 1989;134(6):1253-61.  
995 51. Alvarez-Buylla A, Lim DA. For the long run: maintaining germinal niches in the  
996 adult brain. *Neuron*. 2004;41(5):683-6.  
997 52. Zhang X, Jia S, Chen Z, Chong YL, Xie H, Feng D, et al. Cilia-driven  
998 cerebrospinal fluid flow directs expression of urotensin neuropeptides to straighten the  
999 vertebrate body axis. *Nat Genet*. 2018;50(12):1666-73.  
1000 53. Song Z, Zhang X, Jia S, Yelick PC, Zhao C. Zebrafish as a Model for Human  
1001 Ciliopathies. *J Genet Genomics*. 2016;43(3):107-20.  
1002 54. Lowery LA, De Rienzo G, Gutzman JH, Sive H. Characterization and  
1003 classification of zebrafish brain morphology mutants. *Anat Rec (Hoboken)*. 2009;292(1):94-  
1004 106.

- 1005 55. Lowery LA, Sive H. Initial formation of zebrafish brain ventricles occurs  
1006 independently of circulation and requires the *nagie oko* and *snakehead/atp1a1a.1* gene products.  
1007 *Development*. 2005;132(9):2057-67.
- 1008 56. Olstad EW, Ringers C, Hansen JN, Wens A, Brandt C, Wachten D, et al. Ciliary  
1009 Beating Compartmentalizes Cerebrospinal Fluid Flow in the Brain and Regulates Ventricular  
1010 Development. *Curr Biol*. 2019;29(2):229-41 e6.
- 1011 57. Morimoto Y, Yoshida S, Kinoshita A, Satoh C, Mishima H, Yamaguchi N, et al.  
1012 Nonsense mutation in CFAP43 causes normal-pressure hydrocephalus with ciliary  
1013 abnormalities. *Neurology*. 2019;92(20):e2364-e74.
- 1014 58. Sawamoto K. New Neurons Follow the Flow of Cerebrospinal Fluid in the Adult  
1015 Brain. *Science*. 2006;311(5761):629-32.
- 1016 59. Demars M, Hu YS, Gadadhar A, Lazarov O. Impaired neurogenesis is an early  
1017 event in the etiology of familial Alzheimer's disease in transgenic mice. *J Neurosci Res*.  
1018 2010;88(10):2103-17.
- 1019 60. Ma QH, Bagnard D, Xiao ZC, Dawe GS. A TAG on to the neurogenic functions  
1020 of APP. *Cell Adh Migr*. 2008;2(1):2-8.
- 1021 61. Giacomini A, Stagni F, Trazzi S, Guidi S, Emili M, Brigham E, et al. Inhibition  
1022 of APP gamma-secretase restores Sonic Hedgehog signaling and neurogenesis in the Ts65Dn  
1023 mouse model of Down syndrome. *Neurobiol Dis*. 2015;82:385-96.
- 1024 62. Clement A, Solnica-Krezel L, Gould KL. The Cdc14B phosphatase contributes  
1025 to ciliogenesis in zebrafish. *Development*. 2011;138(2):291-302.
- 1026 63. Fame RM, Lehtinen MK. Emergence and Developmental Roles of the  
1027 Cerebrospinal Fluid System. *Dev Cell*. 2020;52(3):261-75.
- 1028 64. Zappaterra MW, Lehtinen MK. The cerebrospinal fluid: regulator of  
1029 neurogenesis, behavior, and beyond. *Cell Mol Life Sci*. 2012;69(17):2863-78.
- 1030 65. LeMay M, Alvarez N. The relationship between enlargement of the temporal  
1031 horns of the lateral ventricles and dementia in aging patients with Down syndrome.  
1032 *Neuroradiology*. 1990;32(2):104-7.
- 1033 66. Ezratty EJ, Pasolli HA, Fuchs E. A Presenilin-2-ARF4 trafficking axis modulates  
1034 Notch signaling during epidermal differentiation. *J Cell Biol*. 2016;214(1):89-101.
- 1035 67. Nager AR, Goldstein JS, Herranz-Perez V, Portran D, Ye F, Garcia-Verdugo JM,  
1036 et al. An Actin Network Dispatches Ciliary GPCRs into Extracellular Vesicles to Modulate  
1037 Signaling. *Cell*. 2017;168(1-2):252-63 e14.
- 1038 68. Perez-Gonzalez R, Gauthier SA, Kumar A, Levy E. The exosome secretory  
1039 pathway transports amyloid precursor protein carboxyl-terminal fragments from the cell into  
1040 the brain extracellular space. *J Biol Chem*. 2012;287(51):43108-15.
- 1041 69. Spitzer P, Mulzer LM, Oberstein TJ, Munoz LE, Lewczuk P, Kornhuber J, et al.  
1042 Microvesicles from cerebrospinal fluid of patients with Alzheimer's disease display reduced  
1043 concentrations of tau and APP protein. *Sci Rep*. 2019;9(1):7089.
- 1044 70. Leinonen V, Kuulasmaa T, Hiltunen M. iNPH-the mystery resolving. *EMBO Mol*  
1045 *Med*. 2021;13(3):e13720.
- 1046 71. Jeppsson A, Zetterberg H, Blennow K, Wikkelso C. Idiopathic normal-pressure  
1047 hydrocephalus: pathophysiology and diagnosis by CSF biomarkers. *Neurology*.  
1048 2013;80(15):1385-92.
- 1049 72. Jeppsson A, Holtta M, Zetterberg H, Blennow K, Wikkelso C, Tullberg M.  
1050 Amyloid mis-metabolism in idiopathic normal pressure hydrocephalus. *Fluids Barriers CNS*.  
1051 2016;13(1):13.
- 1052 73. Pyykko OT, Lumela M, Rummukainen J, Nerg O, Seppala TT, Herukka SK, et  
1053 al. Cerebrospinal fluid biomarker and brain biopsy findings in idiopathic normal pressure  
1054 hydrocephalus. *PLoS One*. 2014;9(3):e91974.



- 1055 74. Kim JY, Rasheed A, Yoo SJ, Kim SY, Cho B, Son G, et al. Distinct amyloid  
1056 precursor protein processing machineries of the olfactory system. *Biochem Biophys Res*  
1057 *Commun.* 2018;495(1):533-8.
- 1058 75. Reiten I, Uslu FE, Fore S, Pelgrims R, Ringers C, Diaz Verdugo C, et al. Motile-  
1059 Cilia-Mediated Flow Improves Sensitivity and Temporal Resolution of Olfactory  
1060 Computations. *Curr Biol.* 2017;27(2):166-74.
- 1061 76. Yoshihara Y. *Zebrafish Olfactory System.* Springer Japan; 2014. p. 71-96.
- 1062 77. Doty RL. The olfactory system and its disorders. *Semin Neurol.* 2009;29(1):74-  
1063 81.
- 1064 78. Trudeau S, Anne S, Otteson T, Hopkins B, Georgopoulos R, Wentland C.  
1065 Diagnosis and patterns of hearing loss in children with severe developmental delay. *Am J*  
1066 *Otolaryngol.* 2021;42(3):102923.
- 1067 79. Liu Y, Fang S, Liu LM, Zhu Y, Li CR, Chen K, et al. Hearing loss is an early  
1068 biomarker in APP/PS1 Alzheimer's disease mice. *Neurosci Lett.* 2020;717:134705.
- 1069 80. Omata Y, Tharasegaran S, Lim Y-M, Yamasaki Y, Ishigaki Y, Tatsuno T, et al.  
1070 Expression of amyloid- $\beta$  in mouse cochlear hair cells causes an early-onset auditory defect in  
1071 high-frequency sound perception. *Aging.* 2016;8(3):427-39.
- 1072 81. Westerfield M. *The Zebrafish Book : A Guide for the Laboratory Use of*  
1073 *Zebrafish.* [http://zfin.org/zf\\_info/zfbook/zfbkhtml](http://zfin.org/zf_info/zfbook/zfbkhtml). 2000.
- 1074 82. Varshney GK, Carrington B, Pei W, Bishop K, Chen Z, Fan C, et al. A high-  
1075 throughput functional genomics workflow based on CRISPR/Cas9-mediated targeted  
1076 mutagenesis in zebrafish. *Nature protocols.* 2016;11(12):2357-75.
- 1077 83. UniProt C. UniProt: the universal protein knowledgebase in 2021. *Nucleic Acids*  
1078 *Res.* 2021;49(D1):D480-D9.
- 1079 84. Banote RK, Chebli J, Şatır TM, Varshney GK, Camacho R, Ledin J, et al.  
1080 Amyloid precursor protein-b facilitates cell adhesion during early development in zebrafish.  
1081 *Sci Rep.* 2020;10(1):10127.
- 1082 85. Kimmel CB, Ballard WW, Kimmel SR, Ullmann B, Schilling TF. Stages of  
1083 embryonic development of the zebrafish. *Dev Dyn.* 1995;203(3):253-310.
- 1084 86. Lauter G, Söll I, Hauptmann G. Sensitive whole-mount fluorescent in situ  
1085 hybridization in zebrafish using enhanced tyramide signal amplification. *Methods Mol Biol.*  
1086 2014;1082:175-85.
- 1087 87. Lashley T, Rohrer JD, Bandopadhyay R, Fry C, Ahmed Z, Isaacs AM, et al. A  
1088 comparative clinical, pathological, biochemical and genetic study of fused in sarcoma  
1089 proteinopathies. *Brain.* 2011;134:2548-64.
- 1090 88. Livak KJ, Schmittgen TD. Analysis of relative gene expression data using real-  
1091 time quantitative PCR and the 2(-Delta Delta C(T)) Method. *Methods (San Diego, Calif.)*.  
1092 2001;25(4):402-8.
- 1093 89. Gutzman JH, Sive H. Zebrafish brain ventricle injection. *J Vis Exp.* 2009(26).
- 1094
